## Emergence of Zika virus: Role of founder effects, drift and mutational reversions in spread to the Americas

5 Jianying Liu<sup>1#</sup>, Yang Liu<sup>2#</sup>, Chao Shan<sup>2</sup>, Bruno T.D. Nunes<sup>3</sup>, Ruimei Yun<sup>1</sup>, Sherry L. Haller<sup>1</sup>,  
Grace H. Rafael<sup>1</sup>, Sasha R. Azar<sup>1</sup>, Clark R. Andersen<sup>4</sup>, Kenneth Plante<sup>1</sup>, Nikos Vasilakis<sup>5</sup>, Pei-  
Yong Shi<sup>2\*</sup>, Scott C. Weaver<sup>1\*</sup>

10 <sup>1</sup>World Reference Center for Emerging Viruses and Arboviruses, Institute for Human Infections  
and Immunity, and Department of Microbiology and Immunology, University of Texas Medical  
Branch, Galveston, Texas 77555 USA.

<sup>2</sup>Department of Biochemistry and Molecular Biology and Institute for Human Infections and  
Immunity, University of Texas Medical Branch, Galveston, Texas 77555 USA.

<sup>3</sup>Department of Arbovirology and Hemorrhagic Fevers, Evandro Chagas Institute, Ministry of  
Health, Ananindeua, Pará State, Brazil.

15 <sup>4</sup>Department of Preventive Medicine and Community Health, University of Texas Medical  
Branch, Galveston, Texas 77555, USA.

<sup>5</sup>Department of Pathology, Center for Biodefense and Emerging Infectious Diseases, World  
Reference Center for Emerging Viruses and Arboviruses, and Institute for Human Infections and  
Immunity, University of Texas Medical Branch, Galveston, Texas 77555, USA.

20

\*Corresponding authors. Emails: [sweaver@utmb.edu](mailto:sweaver@utmb.edu) and [peshi@utmb.edu](mailto:peshi@utmb.edu).

#These authors contributed equally.

25

## Summary Paragraph

30 **Mosquito-borne viruses have recently spread globally, with major impacts on human health. Zika virus (ZIKV) emerged from obscurity in 2013 to spread from Asia to the South Pacific and the Americas, where millions of people were infected. For the first time, severe clinical manifestations, including Guillain Barré syndrome and congenital defects to the fetus of pregnant women, were detected. Phylogenetic studies have shown that ZIKV evolved in Africa and later spread to Asia, and that the Asian lineage is responsible for the recent epidemics. However, the reasons for the sudden emergence of ZIKV remain incompletely understood. Accumulating evidence on other arboviruses like chikungunya and West Nile suggest the likelihood that viral mutations could be**  
35 **determinants of change in ZIKV transmission efficiency responsible for efficient spread. Using evolutionary analyses, we determined that four mutations, which occurred just before ZIKV introduction to the Americas, represent direct reversions of previous mutations that accompanied spread many decades ago from ZIKV's native Africa to Asia and early circulation there. Experimental infections of mosquitoes, human cells, and mice with ZIKV strains with and without these mutations demonstrated that the original mutations reduced fitness for urban transmission, while the reversions restored fitness, increasing epidemic risk. Our findings help to explain the recent ZIKV emergence and underscore the major yet unpredictable impacts of founder effects and genetic drift on**  
40 **viral emergence. Because they involve random mutations that become fixed in a population when it undergoes bottlenecks during geographic spread and inefficient transmission, founder effects and other forms of drift can limit the ability of mosquito-borne viruses like ZIKV to emerge. Furthermore, their stochastic nature limits our ability to predict epidemics.**

50

Zika virus (ZIKV), an arthropod-borne virus (arbovirus) in the genus *Flavivirus* discovered in 1947<sup>1</sup>, remained obscure with little association with human disease until 2007. Then, small outbreaks occurred in Gabon<sup>2</sup> and Yap Island in Micronesia<sup>3</sup>, associated with mild dengue-like illness. In 2013, ZIKV spread to the South Pacific, where approximately half of the residents of French Polynesia were infected<sup>4</sup>, and an association with Guillain Barré syndrome (GBS) was discovered<sup>5</sup>. Spread through other areas of the South Pacific followed, and the first outbreak ever detected in the Americas was identified in 2015 northeastern Brazil<sup>6</sup>, accompanied by a dramatic increase in the incidence of microcephaly<sup>7</sup> and other congenital malformations now termed congenital Zika syndrome (CZS)<sup>8</sup>. ZIKV continued to spread to nearly all countries in the Americas with the continued association with GBS and CZS, leading the World Health Organization to declare in 2016 a Public Health Emergency of International Concern.

60  
65 Early phylogenetic studies combined with ZIKV detections and seroprevalence indicated that the virus originated in and remains widespread in Africa, and was introduced many decades earlier to Asia<sup>9</sup>. However, the reason(s) for its recent, dramatic spread to the Americas remain enigmatic. One hypothesis is that ZIKV increased its ability to be transmitted efficiently by mosquito vectors through adaptive mutations. This mechanism has been demonstrated for other arboviruses including West Nile<sup>10</sup>, Venezuelan equine encephalitis<sup>11</sup> and chikungunya (CHIKV) viruses<sup>12</sup>. RNA arboviruses exhibit high mutational frequencies due to their lack of proof-reading during genome replication, providing the opportunity for rapid adaptation to changing infection and transmission opportunities<sup>13</sup>. The first evidence supporting this adaptive evolution hypothesis for ZIKV came from studies of an A188V amino acid substitution in the nonstructural protein 1 (NS1-A188V) that occurred just before ZIKV spread to the South Pacific and the Americas. This substitution slightly enhances ZIKV transmission by *Aedes (Stegomyia) aegypti* mosquitoes<sup>14</sup>, the principal epidemic vector<sup>15</sup>.

75

**Directly reverting Zika virus mutations.** To further test the hypothesis that adaptive evolution enhanced epidemic ZIKV transmission, leading to unprecedented spread, millions of infections, and the resulting detection of rare disease manifestations, we performed phylogenetic analyses to identify additional amino acid substitutions that preceded its spread from Asia to the Americas. Extended Data Fig. 1 shows a tree with four substitutions mapped to its branches that preceded epidemic spread, including NS1-A188V<sup>4</sup>. Tracings of these amino acids in ZIKV phylogenetic trees are shown in Extended Data Fig. 2. None of these mutations was noted in earlier, comprehensive phylogenetic studies<sup>16</sup>. Strikingly, when we traced the evolution of these 4 pre-epidemic amino acid substitutions, we found that they represented direct reversions of earlier mutations inferred to have accompanied spread from Africa to Asia, or early circulation in Asia. The simplest explanation for this mutation pattern is that the pre-epidemic substitutions restored fitness (reproduction and survival ability) declines caused by founder effects and/or genetic drift during early, inefficient *A. aegypti*-borne interhuman transmission. This transmission inefficiency is consistent with the lack of recognized outbreaks in Asia before 2010, and bottlenecks that accompany the arbovirus transmission cycle can allow drift to dominate evolution if populations remain small.

Founder effects result in a loss in genetic diversity that accompanies geographic introductions of small founder populations from a large, ancestral population. For human-amplified arboviruses like ZIKV, these typically involve a single infected traveler<sup>17</sup>. Furthermore, several virus population bottlenecks are known to punctuate the arbovirus transmission cycle during mosquito infection and dissemination of virus to the salivary glands. The resultant loss of genetic diversity can result in the fixation of random mutations, the majority of which are by chance deleterious for RNA viruses<sup>18</sup> and other organisms. The hypothesis that African ZIKV strains lost fitness upon their introduction into Asia is also supported by their greater infectivity for *A. aegypti* mosquitoes compared to Asian and subsequent American ZIKV strains<sup>19-21</sup>, as well as their greater virulence in mouse models of human infection<sup>21,22</sup>.

As an initial test of the hypothesis that ZIKV underwent a fitness decline upon its introduction into Africa, followed by fitness restoration, we assessed the fitness of African, Asian, and American ZIKV strains. We used competition fitness assays, where ZIKV strains differing by as little as one amino acid were generated from cDNA clones and mixed in a roughly 1:1 ratio based on Vero cell plaque-forming units (PFU). This inoculum mixture was then used to initiate infections. Following appropriate incubation to allow the two strains to compete for replication and, in mosquitoes, dissemination to the salivary glands, the virus mixture was again quantified by Sanger sequencing of RT-PCR amplicons to estimate the ratios of mixed nucleotides. The relative fitness value  $w$  was analyzed according to  $w=(f_0/i_0)$ , where  $f_0$  is the final ratio of one competitor following infection, and  $i_0$  is the initial ratio in the inoculum or bloodmeal mixture; this ratio reflects relative fitness advantage of one competitor over the other (Fig. 1a). This approach has major advantages over performing individual strain infections with numerous host replicates; each competition is internally controlled, eliminating host-to-host variation that can reduce the power of experiments, and the virus strain ratios can be assayed with more precision than individual virus titers. Thus, competition assays have been used for many studies of microbial fitness<sup>23</sup>, including arboviruses<sup>24-26</sup>. To confirm that our targeted 1:1 ratios were similar in mosquito experimental systems, where RNA:infectious virus ratios could differ based on different levels of mutant infectivity compared to those for Vero cells, we also determined infectious titers of the wt and mutants on C6/36 mosquito cells, and compared them with the Vero PFU and Sanger-derived ratios. These ratios were nearly indistinguishable with no significant differences (Extended data Fig. 3), indicating that frequency-based differences in fitness based on potential mutation effects on initial infectivity were not a concern.

125

**Fitness of major Zika virus lineages.** Initially, we performed competition assays with wild-type (*wt*) ZIKV strains representing the African, Asian pre-epidemic, and American epidemic genotypes (Fig. 1). The highly susceptible Rockefeller strain of *A. aegypti* mosquitoes was used along with interferon type I receptor-deficient A129 mice, models for human infection<sup>27,28</sup>.

130 Following infection with an approximately 1:1 mixture of the African Dakar 41525 and Asian Cambodian FSS13025 strains, or an equivalent mixture of FSS130025 and the Puerto Rican RRVABC59 strain, samples from mosquito bodies and mice were evaluated for changes in the initial ratio, indications of competitive fitness (Fig. 1a). Following oral mosquito infection and incubation, the African strain consistently and significantly won the competition with the Asian strain, and the Puerto Rican strain consistently outcompeted the Asian strain (Fig. 1b). These findings were reproducible when additional African, Asian and American ZIKV strains, as well as a Dominican Republic strain of *A. aegypti* with a low level of colonization (F6), were used (Extended Data Fig. 4). After three days of competition following subcutaneous infection of A129 mice to mimic human infection, the same relative fitness results were obtained when viremic blood (predicted to be the vertebrate host compartment where major selection for efficient mosquito infection occurs) was analyzed (Fig. 1c). Analysis of individual organ samples from mice on day 8 (after viremia had subsided to eliminate this confounding source of virus in organs) showed that these competition outcomes were consistent for replication throughout the mouse (Extended Data Fig. 5). Mosquitoes that fed upon these viremic mice were also evaluated after extrinsic incubation, with the same results of greater fitness of the African versus Asian ZIKV strain, and greater fitness of the American versus Asian strain (Fig. 1d).

135  
140  
145  
150  
155  
160  
Next, primary human cells believed to be involved in seeding viremia were used for competition assays: fibroblasts and keratinocytes<sup>29,30</sup>. The mixed ZIKVs were inoculated into cells and the culture supernatant were harvested, RT-PCR-amplified and Sanger sequenced 3 days post-infection (Extended Data Fig. 6a). The results showed that the African strain and post-epidemic American strains always out-competed the pre-epidemic Asian strain in both cell types (Extended Data Fig. 6b, c). In all these experimental models, the changes in competitor ratios appeared to be greater between the African versus Asian strains compared to the Asian versus American strains. Overall, these data supported the hypothesis that ZIKV underwent a major loss of fitness upon its introduction into Asia, followed by a partial restoration of fitness upon introduction into the Americas. We note that microcephaly and other central nervous system involvement is rare and not known to play a major role in generating viremia, so there should not be major selection for CNS tropism to enhance viremia and subsequent transmission by mosquitoes. Therefore, microcephaly may represent a chance pathogenic outcome that did not result from positive selection. Also, sexual ZIKV transmission is believed to play a minor role compared to vector-borne transmission.

Based on the evidence discussed above, we developed a revised adaptation hypothesis, depicted in Fig. 2a, that the 4 initial amino acid substitutions (and possibly others not undergoing reversion) represent founder effects that reduced the fitness of ZIKV for transmission in the epidemic cycle by reducing *A. aegypti* transmissibility and/or human viremia levels. The reversion of these 4 mutations, and possibly other adaptive mutations, then partially restored ZIKV fitness, allowing for efficient spread to the Americas and major epidemics.

**Fitness effect of reversion mutations.** To test this hypothesis that the 4 revertant mutations restored ZIKV fitness, we used *A. aegypti* mosquitoes and A129 mice in more detailed studies of the combinations of four amino acid substitutions that underwent reversion. For mosquito infections, we assayed bodies to evaluate infection and initial replication, legs to sample the hemolymph, which contains virus that has disseminated from the digestive tract (midgut) into the hemocoel for access to the salivary glands, and saliva collected in vitro to assess the virus population available for transmission (Fig. 2b). Competition between the African ZIKV strain and a mutant containing the four initial amino acid substitutions resulted in a consistent advantage for the African strain in all mosquito samples (Fig. 2c), as did infection of

A129 mice as sampled in major organs and blood (Fig. 2d, Extended Data Fig. 7a). In contrast, when the four reversion substitutions were placed into the pre-epidemic Asian strain to recapitulate ZIKV evolution just before introduction into the Americas, these substitutions  
180 resulted in a major fitness gain (Fig. 2e, f, Extended Data Fig. 7b). When mosquitoes were fed upon the viremic mice, the same outcome was observed (Fig. 2g, h). These results indicate that the four substitutions that directly reverted prior to the introduction of ZIKV into the Americas were major components of the fitness differences among African, Asian and American virus strains. At the same time, similar competition assays were performed in human fibroblasts and  
185 keratinocytes. The ZIKV strains containing these four initially substituted amino acids always won the competition in these human primary cells (Extended Data Fig. 8).

To assess the roles of the individual amino acid substitutions in the overall fitness differences among ZIKV strains, we tested them individually using the same experimental systems. Placed individually into the African strain, all four initial mutations reduced overall  
190 fitness for infection, dissemination (two mutants showed no fitness effect in this compartment) and transmission by mosquitoes, although only the C-A106T and NS1-V188A results were significant (Fig. 3a-c). The same trends were observed in mosquito bodies, legs and saliva (Fig. 3a-c). When the reversions were placed into the Asian strain, only the NS1-A188V mutant produced a significant increase in ZIKV infection in the mosquito bodies, legs and saliva,  
195 indicating this mutation site may have a dominant role during the competition (Fig. 3d-f). To confirm this, the Dakar NS1-V188A and FSS NS1-A188V mutants were mixed with corresponding *wt* strains and inoculated into A129 mice. The ZIKVs containing valine in the 188<sup>th</sup> NS1 position exhibited a fitness advantage in both mice (Fig. 3g, h, Extended Data Fig. 9) and mosquitoes (Fig. 3i, j). The slight asymmetry in the fitness effects between some of the initial  
200 4 mutations in the African strain and the reversions in the Cambodian pre-epidemic strain could reflect epistatic interactions that differ between the two virus strains.

Finally, the overall fitness of the sets of four mutations or reversions were tested over a complete experimental transmission cycle. To initiate the cycle, mosquitoes were inoculated intrathoracically (to ensure uniform infection) with mixtures of the African ZIKV strain and the  
205 four initial mutations, or the Asian strain with the four reversions (Fig. 4a). Following six days of extrinsic incubation (mosquitoes become infectious more rapidly after intrathoracic than oral infection), these mosquitoes were exposed to A129 mice for oral transmission. Three days later during peak viremia, naïve mosquitoes were allowed to feed on the mice, then these mosquitoes were assayed after 14 days of extrinsic incubation as in the above experiments. In  
210 salivary glands following incubation after mosquito inoculation, the initial four mutations decreased the fitness of the African ZIKV strain (Fig. 4b), and the four reversions increased the fitness of the Asian strain (Fig. 4c) as observed after oral infection (Fig. 2c, e). These fitness effects continued during infection of mouse blood and organs (Fig. 4d, e, Extended Data Fig. 10) and also in mosquitoes fed orally on these mice during viremia (Fig 4f, g). Overall, these  
215 results demonstrate that the four initial mutations reduced the fitness of the African ZIKV strain through a complete transmission cycle, while the four reversions at least partially restored fitness.

**History of ZIKV fitness in Asia.** Overall, our results strongly support the hypothesis that ZIKV underwent fitness declines upon its introduction into Asia many decades ago, and/or  
220 during its initial stages of circulation there when a lack of recognized outbreaks suggests limited urban circulation. An alternative hypothesis that would not rely on drift is that ZIKV host range changed upon its introduction into Asia, followed by another change (or reversion in host usage) just before introduction into the Americas; both of these changes could have resulted in positive selection that happened to involve the same four amino acids, resulting in reversion. The  
225 simplest form of this hypothesis would be that an ancestral sylvatic cycle involving different vectors and vertebrate hosts from those in Africa was the initial form of Asian transmission, and the urban cycle only developed there relatively recently accompanied by the reversions.

230 However, there is no evidence of enzootic ZIKV transmission in Asia, and the 1966 ZIKV  
isolation from *A. aegypti* mosquitoes in Malaysia suggests that human-amplified transmission  
has been ongoing in Asia for many decades. A simpler explanation is that this urban cycle was  
inefficient due to founder effects and drift, before reversion of these mutations increased  
transmission efficiency, facilitating spread to the South Pacific and the Americas. This same  
235 pattern of fitness loss accompanied CHIKV introduction into Asia about a century ago, when a  
major deletion in the 3' untranslated genome region occurred. This fitness of this Asian lineage  
remains incompletely restored to this day<sup>31</sup>. However, the inability of these four ZIKV reversion  
mutations to generate fitness comparable to that of African strains suggests that additional  
mutations, possibly also the result of founder effects or drift but without direct reversions, also  
240 limited transmission and spread in Asia. Additional mutations that occurred during circulation in  
Asia must be tested to expand our results to a comprehensive understanding of ZIKV evolution,  
and understanding the mechanisms of fitness effects of the four substitutions we studied require  
further study.

**Parallels with CHIKV.** Our results as well as the evolutionary history of ZIKV have  
remarkable parallels to those of CHIKV, which also evolved in Africa and spread many decades  
ago to Asia before its recent introduction into the Americas<sup>12</sup>. Previous studies of CHIKV  
245 indicate that the virus arrived in Asia many decades ago with debilitating mutations in its 3'  
untranslated genome region (3'UTR), with fitness only partially restored over many decades  
through point mutations and a duplication<sup>31</sup>. Another mutation in the E1 glycoprotein, also a  
probable founder effect, prevented for many decades CHIKV adaptation for efficient  
transmission by *A. albopictus* mosquitoes in Asia, their native territory<sup>32</sup>. Then, just before or  
250 upon its introduction into the Americas in 2013, a duplication in the 3'UTR also improved CHIKV  
fitness<sup>33</sup>. However, unlike ZIKV, another lineage of CHIKV has also undergone a series of  
adaptive mutations to enhance its ability to use *A. albopictus* for transmission with no evidence  
of founder effects, and the relative fitness advantages of these CHIKV mutations far exceed  
those of the four ZIKV mutations that we studied; for example, individual *A. albopictus*-adaptive  
255 CHIKV mutations showed relative fitness values of 5-40, while the combination of 4 ZIKV  
mutations we studied had a lower overall fitness effect than any of these individual CHIKV  
mutations (Extended Data Table 1).

The similarities in the presumed roles of founder effects in the evolution and emergence  
potential of ZIKV and CHIKV suggest that drift has been understudied as a factor in the  
260 emergence of arboviral and other RNA viral diseases, and that the stochastic nature of founder  
effects may limit our ability to ultimately predict the emergence of new viral diseases.

Finally, the high fitness of the African ZIKV strains in all experimental systems we utilized  
raises important questions about the risk of outbreaks and severe disease on that continent.  
The greater transmissibility of these African strains, even compared to American strains<sup>19</sup>,  
265 raises the question of why outbreaks have never been detected in Africa aside from one in  
Angola caused by a strain imported from the Americas<sup>34</sup>. Limited African surveillance and the  
widespread presence of other infections that typically lead to Zika misdiagnosis in the absence  
of laboratory diagnostics could be responsible. Herd immunity in Africa, which could also play a  
role in limiting outbreaks as well as the incidence of congenital Zika syndrome, has been  
270 reported to range from 1-52%<sup>35</sup>. However, some studies have used methods other than  
neutralization that could be highly cross-reactive with other endemic flaviviruses. We also  
cannot rule out the possibility that our models for human infection are not suitable to determine  
ZIKV fitness for human amplification. Additional surveillance and work with human cells and  
possibly nonhuman primate models are needed to further explore this possibility and to better  
275 understand the lack of Zika outbreaks in Africa caused by African lineage strains.

In addition to the fitness for transmission that we examined, the history of ZIKV's ability to  
cause GBS and CZS requires further study. It is possible that enhanced viremia just before  
spread to the Americas, suggested by our model systems involving human cells and A129 mice,

280 could at least partially explain the emergence of these severe disease outcomes if viremia magnitude is correlated with infection of the placenta. However, better surveillance in Africa is ultimately needed to determine if American or recent Asian strains are unique in this pathogenic potential.

## Methods.

285 Mouse and mosquito studies were performed in accordance with the guidance for the Care and Use of Laboratory Animals of the University of Texas Medical Branch (UTMB). The protocol (protocol number 1708051 for mouse) were approved by the Institutional Animal Care and Use Committee (IACUC) at UTMB. All the mouse manipulations were performed under anesthesia by isoflurane.

### 290 Mice, mosquitoes, cells and viruses

A129 mice, which are deficient in type I interferon receptors, were bred and maintained in animal biosafety level 2 (ABSL2) facilities at UTMB. Sex-matched mice, randomly selected and 6-to-8-week-old, were used. The *Aedes aegypti* Rockefeller strain and *A. aegypti* Dominican Republic strain (F6) were maintained in an incubator at 28°C and 80% humidity. Vero cells (CCL81) and C6/36 cells for virus rescue, proliferation and titration were purchased from the American Type Culture Collection (Bethesda, MD, USA) and maintained in Dulbecco's modified Eagle's medium (Gibco, Waltham, MA, USA) with 10% heat-inactivated fetal bovine serum (Atlanta Biologicals, Flowery Branch, GA, USA), and supplemented with 1% Tryptose phosphate broth (Gibco, Waltham, MA, USA) for C6/36 cells. The human primary dermal fibroblast cells and human epidermal keratinocyte cells were purchased from Lonza (Walkersville, MD, USA) and were maintained in FGM-2 BulletKit (Lonza) and KGM-Gold BulletKit (Lonza) media, respectively. All cells were verified and tested negative for mycoplasma. The parental African lineage ZIKV Dakar 41662 strain (KU955592), and 41671 stain (KU955595), and Asian lineage ZIKV Dominican Republic R114916 (KX766028), and Honduras HN-ME 59 stains were obtained from the World Reference Center for Emerging Viruses and Arboviruses at UTMB. The ZIKV DK-WT (Dakar wild-type 41525 strain, KU955591), DK-A106T (capsid 106th amino-acid), DK-A1V (pre-membrane 1st amino-acid), DK-V188A (nonstructural protein 1 188th amino-acid), DK-V872M (nonstructural protein 5 872nd amino-acid) were constructed using standard site-directed mutagenesis of cDNA clones and rescued on Vero cells using electroporation of transcribed RNA. The FSS-WT (FSS13025 wild-type strain, KU955593), FSS-T106A, FSS-V1A, FSS-A188V and FSS-M872V, as well as reversion mutants placed in the ZIKV Dakar strain, were constructed in the same manner, along with the DK-4M and FSS-4M that combined all four mutations on the matched backbone.

### 315 Competition assay

To better understand the relative fitness of different ZIKV strains and mutants, we conducted competition assays between two virus strains or a wild-type and mutant strain in various models. Initial 1:1 virus:mutant mixtures were made based on PFU titers determined in Vero cells, and virus ratios used to calculate fitness were determined by Sanger sequencing of RT-PCR amplicons. The PFU:genome ratio was consistent among all of our ZIKV strains and constructs, as estimated from the inocula and bloodmeals by comparing Vero cell PFU to genome copies as estimated from real-time RT-qPCR standard curves. To confirm that ratios were also similar in mosquito experimental systems, where RNA:infectious virus ratios could differ based on different levels of infectivity compared to Vero cells, we also determined infectious titers of the wt and mutants on C6/36 mosquito cells, and compared then with the Vero-infectious and Sanger-derived ratios.

**Mosquitoes.** The *Aedes aegypti* Rockefeller strain and *A. aegypti* Dominican Republic strain (F6) were used for the following studies. Triplicate mixtures of viruses were diluted to 6 log<sub>10</sub> PFU/ml mixed at a 1:1 ratio based on Vero PFU titers. Virus mixtures were subsequently mixed at a ratio of 1:1 with PBS-washed sheep blood cells (Hemostat laboratories, Galveston, TX,



USA). Aliquots of blood meals were collected to verify the initial virus proportions in the inoculum. Following a 14-day extrinsic incubation, saliva expectorated into capillary tubes, legs representing virus disseminated into the hemocoel, or remaining mosquito bodies were collected separately in a 2ml Eppendorf Safe Lock tube with 250µl DMEM (2% FBS, 1% Sodium Pyruvate) with 25 mg/ml Amphotericin B and a stainless steel bead (Qiagen, Hilden, Germany). Samples were stored at -80°C.

**A129 mice.** Sex-matched A129 mice (6-8 weeks old) were used for ZIKV competition assays. The A129 mouse is defective for the interferon type I receptor and susceptible to ZIKV infection in vivo with high titered viremia. Mixtures of ZIKV strains (total  $1 \times 10^4$  PFU/mouse) were inoculated intradermally to simulate a mosquito bite. Titers of viruses before mixing were plaque assayed to verify proper concentrations. Also, an aliquot of the inoculum was reserved for estimating the initial ratio of viruses. Mice were bled retro-orbitally on day 3 post infection representing the peak. Serum was collected from blood via centrifugation at 2,000 g for 5 minutes and stored at -80°C until analysis. Eight days post infection, all infected mice were euthanized and necropsied and major organs collected in a 2ml Eppendorf Safe Lock tube with 500µl DMEM (2% FBS, 1% Sodium Pyruvate) and a stainless-steel bead. Samples were stored at -80°C.

**Human primary cells.** The human fibroblasts and keratinocytes were purchased and qualified by ATCC. Cells were seeded into 12-well plates 1 day before infection to allow them reach 90% confluence. Mixtures of ZIKVs (1 PFU/cell MOI) were added into the cells and incubated at 37°C for 2 hours. Titers of viruses before mixing were plaque assayed to verify proper concentrations. Also, an aliquot of the inoculum was reserved for estimating the initial ratio of the viruses. After incubation, the cells were washed 3 times with 1ml of PBS. The infected cells were cultured, and the supernatant were collected from days 1-5. Samples were stored at -80°C for further analysis.

**Sample preparation and Nucleic acid extraction.** Aliquots of mosquito lysates, mouse serum, mouse organ lysates and human primary cell supernatant samples were prepared in RNeasy Mini Kit (Qiagen) lysis buffer RLT (400µl), and nucleic acids were subsequently extracted according to the manufacturer's protocol. After extraction, a portion of the RNA was immediately applied to a one step RT-PCR assay and the remaining material was archived at -80°C.

**Quantitative real-time RT-PCR assays.** Prior to Sanger sequencing analysis, virus-positive samples were identified by quantitative real-time RT-PCR, which was performed using a QuantiTect Probe RT-PCR Kit (Qiagen) on the LightCycler 480 system (Roche, Rotkreuz, Switzerland) following the manufacturer's protocol. The primers and probes are listed in Extended Data Table 2. The absolute quantification of ZIKV RNA was determined using a standard curve with in vitro-transcribed, full-length ZIKV RNAs.

**Reverse transcriptase PCR.** 400-500 bp of RT-PCR product were synthesized and amplified from extracted RNA using a SuperScript™ III One-Step RT-PCR kit (Invitrogen, Carlsbad, CA, USA). 20µl reactions were assembled in PCR 8-tube strips through the addition of 10µl 2X reaction mix, 0.4µl SuperScript™ III RT/Platinum™ Taq Mix, 0.8µl 10 µM specific forward primer, 0.8µl 10 µM specific reverse primer (see Extended Data Table 2), 4µl of extracted RNA and 6µl Rnase-free water. RT was completed using the following protocol: 1) 55°C, 30 min; 94°C, 2 min; 2) 94°C, 15s; 60°C, 30s; 68°C, 1min; 40 cycles; 3) 68°C, 5 min; 4) indefinite hold at 4°C. 2µl of generated PCR products were loaded to 1% DNA agarose gel to verify the size. The left samples were purified by a QIAquick PCR Purification kit (Qiagen) according to the manufacturer's protocol.

385 **Sanger sequencing and electropherogram peak height analysis.** Sequences of the purified  
RT-PCR products were generated using a BigDye Terminator v3.1 cycle sequencing kit  
(Applied Biosystems, Austin, TX, USA). The products of the sequencing reactions were then  
purified using a 96-well plate format (EdgeBio, San Jose, CA, USA), and then analyzed on a  
3500 Genetic Analyzer (Applied Biosystems). The peak electropherogram height representing  
each mutation site and proportion of each competitor was analyzed using the QSVanalyser  
390 program<sup>37</sup>.

#### **intrathoracic inoculation of mosquitoes.**

The intrathoracic microinjection of ZIKV into mosquitoes has been described previously<sup>38</sup>.  
Female mosquitoes were anaesthetized on a cold tray (0°C). Then, a defined titer (1 pfu in 100  
395 nl total inoculum volume) of mixed ZIKV strains were inoculation into the mosquito thorax with a  
Nanoject III (Drummond, Pennsylvania, USA). Six days later, the infected mosquitoes were  
allowed to feed on A129 mice to transmit ZIKV.

#### **Membrane blood feeding.**

400 Seven-day-old female mosquitoes were placed into mesh-covered cartons and provided cotton  
balls containing 10% sucrose. Complement-inactivated sheep blood was mixed with different  
ZIKV combinations for mosquito feeding via a Hemotek system membrane feeder (5W1,  
Hemotek limited, Lancashire, UK). The total viral titers of the two competing ZIKVs in the blood  
meals were  $1 \times 10^6$  PFU/ml. Fully engorged mosquitoes were incubated for 14 days until harvest.  
405 At that time, live mosquitoes were killed by freezing and homogenized individually (TissueLyser  
II, Qiagen) for RNA isolation and real-time qPCR detection. The infected mosquito RNAs were  
RT-PCR amplified, followed by Sanger sequencing.

#### **Mosquito feeding on infected mice.**

410 Ten female mosquitoes were placed into mesh-covered cartons for blood feeding following  
sugar-starvation for 24 hrs. ZIKV-infected A129 mice were anaesthetized with ketamine and  
placed on the top of the cartons for 20 min of feeding in the dark. Then, fully engorged  
mosquitoes were transferred to new containers and incubated for 14 days prior to RT-PCR,  
followed by Sanger sequencing of amplicons.

415

#### **Plaque assay.**

The plaque assay was performed on Vero cells following procedures described previously<sup>39</sup>. In  
brief, Vero cells were seeded into 12-well plates 12 to 16 hours prior to the plaque assay. 25  $\mu$ l  
of each sample were used for 10-fold serial dilutions. For each dilution, 200  $\mu$ l were added to  
420 12-well plates with 90% confluent Vero cells. The cells were incubated at 37 °C with 5% CO<sub>2</sub> for  
1h with gentle rocking every 15 min. After that, 1 ml of overlay (DMEM, 2% FBS, containing  
0.8% methyl cellulose with 1% antibiotics) was added onto each well. The plates were cultured  
at 37°C with 5% CO<sub>2</sub> for 4 days until clear plaques formed. The plates were fixed in 4%  
formaldehyde solution for 2 hours and stained with 1% crystal violet.

425

#### **Focus-forming assay.**

The FFA was performed on C6/36 mosquito cells as described previously<sup>19</sup>. In brief, C6/36 cells  
were seeded into 12-well plates 12-16 h prior to the assay. A 25  $\mu$ l volume of each sample was  
used for 10-fold serial dilutions. For each dilution, 200  $\mu$ l were added to 12-well plates with 90%  
430 confluent cells. The cells were incubated at 30°C with 5% CO<sub>2</sub> for 1h with gentle rocking every

15 min. After a 5-day incubation, plates were fixed with methanol / acetone (1:1), washed by PBS, and blocked with 2% FBS/PBS before overnight incubation with mouse anti-ZIKV antibody (4G2). Plates were washed and incubated with goat anti-mouse secondary antibody conjugated to horseradish peroxidase (KPL, Gaithersburg, MD, USA), then washed and developed with aminoethyl carbazole solution (Enzo Diagnostics, Farmingdale, NY, USA) prepared according to the manufacturer's protocol for detection of infection foci.

### Construction of ZIKV mutant infectious clones.

The ZIKV FSS13025 full-length cDNA infectious clone pFLZIKV-FSS<sup>39</sup> (referred as FSS-WT in text) was used as the backbone for engineering FSS-T106A, FSS-V1A, FSS-A188V, FSS-M872V and FSS-4M mutants. The ZIKV Dakar 41525 full-length cDNA infectious clone pFLZIKV-DK (referred as DK-WT in text) was used as the backbone for engineering DK-A106T, DK-A1V, DK-V188A, DK-V872M and DK-4M mutants. Standard overlapping PCR was performed to amplify the cDNA fragment between unique restriction enzyme sites that contained the corresponding mutations. Afterward, the fragments were cloned into pFLZIKV-FSS or pFLZIKV-DK plasmids and propagated in *E. coli* strain Top 10 (ThermoFisher Scientific, Framingham, MA, USA). All restriction enzymes were purchased from New England BioLabs (Massachusetts, USA). The plasmids were validated by restriction enzyme digestion and Sanger DNA sequencing. All primers were synthesized from Integrated DNA Technologies and are available upon request.

### RNA transcription, electroporation and virus recovery.

The full-length cDNA clone plasmids of all ZIKVs were linearized with restriction enzyme *Cl*I prior to RNA transcription. The linearized DNAs were purified by phenol-chloroform extraction and ethanol precipitation. RNA transcripts of ZIKVs were synthesized using the T7 mMessage mMachinE kit (Ambion, California, USA) *in vitro*. The quantity and quality of RNAs were verified by Spectrophotometry (DS-11, DeNovix, Delaware, USA) and Agarose gel electrophoresis. For RNA transfection, 10  $\mu$ g of transcribed RNA were electroporated into  $8 \times 10^6$  Vero cells using the Gene Pulser Xcell™ Electroporation Systems (Bio-rad, California, USA) under as described previously<sup>39</sup>. The viral culture supernatant was harvested when obvious cytopathic effects (CPE) of the transfected Vero cells were observed, and the titers of all ZIKVs were measured on Vero cells using plaque assays<sup>39</sup>.

### Statistics.

For virus competition experiments in mosquitoes, A129 mice and human primary cells, relative replicative fitness values for viruses in each sample were analyzed according to  $w=(f_0/i_0)$ , where  $i_0$  is the initial ratio of one competitor and  $f_0$  is the final ratio after competition. Sanger sequencing (initial timepoint T0) counts for each virus strain being compared (for example, wild-type versus mutant strains) were based upon average counts over several replicate samples of inocula or bloodmeals per experiment (effectively averaging the replicates), and post-infection (timepoint T1) counts were taken from samples of individual subjects, such that for each strain the ratio between counts at T0 and T1 ( $T1/T0$ ) reflects a measure of a sample from a single mosquito, mouse or cell culture well in a specific experiment for that strain. Typically, multiple experiments were performed, so that  $f_0/i_0$  was clustered by experiment. To model  $f_0/i_0$ , the ratio  $T0/T1$  was found separately for each subject in each strain group, log (base-10) transformed to an improved approximation of normality, and modeled by analysis of variance with relation to group, adjusting by experiment to control for clustering within experiment. Specifically, the model was of the form  $\text{Log}_{10\_CountT1overCountT0} \sim \text{Experiment} + \text{Group}$ . Fitness ratios

480 between the two groups [the model's estimate of  $w=(f_0/i_0)$ ] were assessed per the coefficient of  
the model's Group term, which was transformed to the original scale as  $10^{\text{coefficient}}$ . This  
modeling approach compensates for any correlation due to clustering within experiment  
similarly to that of corresponding mixed effect models, and is effective since the number of  
485 experiments was small.

Statistical analyses were performed using R statistical software (R Core Team, 2019, version  
3.6.1). In all statistical tests, two-sided  $\alpha=.05$ . Catseye plots<sup>40</sup>, which illustrate the normal  
distribution of the model-adjusted means, were produced using the "catseyes" package<sup>41</sup>.

490 **Data availability.**

Extended Data and source data for generating main figures are available in the online version of the paper. Any other information is available upon request.

## Acknowledgments

495

S.C.W was supported by NIH grants AI120942 and 121452. P.-Y.S. was supported by NIH grants AI142759, AI127744, and AI136126, and awards from the Kleberg Foundation, John S. Dunn Foundation, Amon G. Carter Foundation, Gilson Longenbaugh Foundation, and Summerfield Robert Foundation. J. L. was supported by the McLaughlin Fellowship Fund. We

500

thank Aaron Brault for helpful suggestions for the manuscript.

## Author Contributions

505 S.C.W., J.L., Y.L., C.S., and P.-Y.S. designed the experiments and/or wrote the manuscript; J.L. and Y.L. performed the majority of the experiments and analyzed the data; S.C., B.T.D.N., and P.-Y.S. developed the reverse genetic system for ZIKV strains; R.M. and N.V. provided the mosquito colonies; R.M. assisted in mosquito collection; S.L.H. assisted in designing the competition assay; G.H.R. and S.R.A provide the A129 mice colonies; C.R.A. assisted with statistics analyses; K.P. provided ZIKV parental strains and contributed experimental suggestions. All authors reviewed, critiqued and provided comments on the text.

510 **Competing Interests statement**

The authors declare that they have no competing financial interests. Correspondence and requests for materials should be addressed to S.C.W. (sweaver@utmb.edu) or P.-Y.S. (peshi@utmb.edu).

515



## References.

- 1 Dick, G. W., Kitchen, S. F. & Haddow, A. J. Zika virus. I. Isolations and serological specificity. *Trans. R. Soc. Trop. Med. Hyg.* **46**, 509-520 (1952).
- 520 2 Grard, G. *et al.* Zika virus in Gabon (Central Africa)--2007: a new threat from *Aedes albopictus*? *PLoS Negl. Trop. Dis.* **8**, e2681, doi:10.1371/journal.pntd.0002681 (2014).
- 3 Duffy, M. R. *et al.* Zika virus outbreak on Yap Island, Federated States of Micronesia. *N. Engl. J. Med.* **360**, 2536-2543, 10.1056/NEJMoa0805715 (2009).
- 4 Cao-Lormeau, V. M. *et al.* Zika virus, French polynesia, South pacific, 2013. *Emerg. Infect. Dis.* **20**, 1085-1086, doi:10.3201/eid2006.140138 (2014).
- 525 5 Oehler, E. *et al.* Zika virus infection complicated by Guillain-Barre syndrome--case report, French Polynesia, December 2013. *Euro. Surveill.* **19**, (2014).
- 6 Campos, G. S., Bandeira, A. C. & Sardi, S. I. Zika Virus Outbreak, Bahia, Brazil. *Emerg. Infect. Dis.* **21**, 1885-1886, doi:10.3201/eid2110.150847 (2015).
- 530 7 Brasil, P. *et al.* Zika Virus Infection in Pregnant Women in Rio de Janeiro. *N. Eng. J. Med.* **375**, 2321-2334, doi:10.1056/NEJMoa1602412 (2016).
- 8 Aliota, M. T. *et al.* Zika in the Americas, year 2: What have we learned? What gaps remain? A report from the Global Virus Network. *Antiviral Res.* **144**, 223-246, doi:10.1016/j.antiviral.2017.06.001 (2017).
- 535 9 Haddow, A. D. *et al.* Genetic characterization of Zika virus strains: geographic expansion of the Asian lineage. *PLoS Negl. Trop. Dis.* **6**, e1477, doi:10.1371/journal.pntd.0001477 (2012).
- 10 Moudy, R. M., Meola, M. A., Morin, L. L., Ebel, G. D. & Kramer, L. D. A newly emergent genotype of West Nile virus is transmitted earlier and more efficiently by *Culex* mosquitoes. *Am. J. Trop. Med. Hyg.* **77**, 365-370, doi: org/10.4269/ajtmh.2007.77.365 (2007).
- 540 11 Brault, A. C. *et al.* Venezuelan equine encephalitis emergence: Enhanced vector infection from a single amino acid substitution in the envelope glycoprotein. *Proc. Natl. Acad. Sci. U.S.A.* **101**, 11344-11349, doi: 10.1073/pnas.0402905101 (2004).
- 545 12 Weaver, S. C., Charlier, C., Vasilakis, N. & Lecuit, M. Zika, Chikungunya, and Other Emerging Vector-Borne Viral Diseases. *Annu. Rev. Med.* **69**, 395-408, doi:10.1146/annurev-med-050715-105122 (2018).
- 13 Domingo, E. & Holland, J. J. in *Evolutionary Biology of Viruses* (ed S S Morse). 161-184, (Raven Press, 1994).
- 550 14 Liu, Y. *et al.* Evolutionary enhancement of Zika virus infectivity in *Aedes aegypti* mosquitoes. *Nature* **545**, 482-486, doi:10.1038/nature22365 (2017).
- 15 Azar, S. R., Diaz-Gonzalez, E. E., Danis-Lonzano, R., Fernandez-Salas, I. & Weaver, S. C. Naturally infected *Aedes aegypti* collected during a Zika virus outbreak have viral titres consistent with transmission. *Emerg. Microbes Infect.* **8**, 242-244, doi:10.1080/22221751.2018.1561157 (2019).
- 555 16 Pettersson, J. H. *et al.* How Did Zika Virus Emerge in the Pacific Islands and Latin America? *MBio.* **7**, doi:10.1128/mBio.01239-16 (2016).
- 17 Mier, Y. T.-R. L., Tatem, A. J. & Johansson, M. A. Mosquitoes on a plane: Disinsection will not stop the spread of vector-borne pathogens, a simulation study. *PLoS Negl. Trop. Dis.* **11**, e0005683, doi:10.1371/journal.pntd.0005683 (2017).
- 560 18 Duarte, E. A. *et al.* Subclonal components of consensus fitness in an RNA virus clone. *J. Virol.* **68**, 4295-4301 (1994).
- 19 Roundy, C. M. *et al.* Variation in *Aedes aegypti* Mosquito Competence for Zika Virus Transmission. *Emerg. Infect. Dis.* **23**, 625-632, doi:10.3201/eid2304.161484 (2017).

- 565 20 Weger-Lucarelli, J. *et al.* Vector Competence of American Mosquitoes for Three Strains of Zika Virus. *PLoS Negl. Trop. Dis.* **10**, e0005101, doi:10.1371/journal.pntd.0005101 (2016).
- 21 Smith, D. R. *et al.* African and Asian Zika Virus Isolates Display Phenotypic Differences Both *In Vitro* and *In Vivo*. *Am. J. Trop. Med. Hyg.* **98**, 432-444, doi:10.4269/ajtmh.17-0685 (2018).
- 570 22 Duggal, N. K. *et al.* Differential Neurovirulence of African and Asian Genotype Zika Virus Isolates in Outbred Immunocompetent Mice. *Am. J. Trop. Med. Hyg.* **97**, 1410-1417, doi:10.4269/ajtmh.17-0263 (2017).
- 23 Wisner, M. J. & Lenski, R. E. A Comparison of Methods to Measure Fitness in *Escherichia coli*. *PLoS One* **10**, e0126210, doi:10.1371/journal.pone.0126210 (2015).
- 575 24 Grubaugh, N. D. *et al.* Genetic Drift during Systemic Arbovirus Infection of Mosquito Vectors Leads to Decreased Relative Fitness during Host Switching. *Cell Host Microbe* **19**, 481-492, doi:10.1016/j.chom.2016.03.002 (2016).
- 25 Bergren, N. A. *et al.* "Submergence" of Western equine encephalitis virus: Evidence of positive selection argues against genetic drift and fitness reductions. *PLoS Pathog.* **16**, e1008102, doi:10.1371/journal.ppat.1008102 (2020).
- 580 26 Coffey, L. L. & Vignuzzi, M. Host alternation of chikungunya virus increases fitness while restricting population diversity and adaptability to novel selective pressures. *J. Virol.* **85**, 1025-1035, doi:10.1128/JVI.01918-10 (2011).
- 585 27 Lazear, H. M. *et al.* A Mouse Model of Zika Virus Pathogenesis. *Cell Host Microbe* **19**, 720-730, doi:10.1016/j.chom.2016.03.010 (2016).
- 28 Rossi, S. L. *et al.* Characterization of a Novel Murine Model to Study Zika Virus. *Am. J. Trop. Med. Hyg.* **94**, 1362-1369, doi:10.4269/ajtmh.16-0111 (2016).
- 29 Hamel, R. *et al.* Biology of Zika virus infection in human skin cells. *J. Virol.* **89**, 8880-8896, doi: 10.1128/JVI.00354-15 (2015).
- 590 30 Kim, J. A., Seong, R. K., Son, S. W., & Shin, O. S. Insights into ZIKV-mediated innate immune responses in human dermal fibroblasts and epidermal keratinocytes. *J. Invest. Dermatol.* **139**, 391-399, doi: 10.1016/j.jid.2018.07.038 (2019).
- 31 Chen, R., Wang, E., Tsetsarkin, K. A. & Weaver, S. C. Chikungunya virus 3' untranslated region: adaptation to mosquitoes and a population bottleneck as major evolutionary forces. *PLoS Pathog.* **9**, e1003591, doi:10.1371/journal.ppat.1003591 (2013).
- 595 32 Tsetsarkin, K. A. *et al.* Chikungunya virus emergence is constrained in Asia by lineage-specific adaptive landscapes. *Proc. Natl. Acad. Sci. U. S. A.* **108**, 7872-7877, doi:10.1073/pnas.1018344108 (2011).
- 33 Stapleford, K. A. *et al.* Whole-Genome Sequencing Analysis from the Chikungunya Virus Caribbean Outbreak Reveals Novel Evolutionary Genomic Elements. *PLoS Negl. Trop. Dis.* **10**, e0004402, doi:10.1371/journal.pntd.0004402 (2016).
- 600 34 Hill, S. C. *et al.* Emergence of the Asian lineage of Zika virus in Angola: an outbreak investigation. *Lancet Infect. Dis.* **19**, 1138-1147, doi:10.1016/S1473-3099(19)30293-2 (2019).
- 605 35 Saiz, J. C., Vázquez-Calvo, Á., Blázquez, A. B., Merino-Ramos, T., Escribano-Romero, E., & Martín-Acebes, M. A. Zika virus: the latest newcomer. *Front. Microbiol.* **7**, 496. <https://doi.org/10.3389/fmicb.2016.00496> (2016).
- 36 Tsetsarkin, K. A. *et al.* Multi-peaked adaptive landscape for chikungunya virus evolution predicts continued fitness optimization in *Aedes albopictus* mosquitoes. *Nat. Commun* **5**, 1-14, doi: <https://doi.org/10.1038/ncomms5084> (2014).
- 610 37 Carr, I. M. *et al.* Inferring relative proportions of DNA variants from sequencing electropherograms. *Bioinformatics* **25**, 3244-3250, doi: 10.1093/bioinformatics/btp583 (2009).

- 615 38 Liu, J. *et al.* Flavivirus NS1 protein in infected host sera enhances viral acquisition by  
mosquitoes. *Nat. Microbiol.* **1**, 1-11, doi: <https://doi.org/10.1038/nmicrobiol.2016.87>  
(2016).
- 39 Shan, C. *et al.* An infectious cDNA clone of Zika virus to study viral virulence, mosquito  
transmission, and antiviral inhibitors. *Cell Host Microbe* **19**, 891-900, doi:  
620 [org/10.1016/j.chom.2016.05.004](https://doi.org/10.1016/j.chom.2016.05.004). (2016).
- 40 Cumming, G. (2014). The new statistics: Why and how. *Psychol Sci* **27**, 7-29.  
doi:10.1177/0956797613504966 (2014).
- 41 Clark Andersen (2019). *catseyes*: Create Catseye Plots Illustrating the Normal  
Distribution of the Means. R package version 0.2.3.

625 **Figure legends and Table.**

**Figure 1. African lineage ZIKV and post-epidemic Asian lineage ZIKV had the fitness advantage versus pre-epidemic Asian lineage ZIKVs in both A129 mice and mosquitoes**

630 **a**, Experimental design of competition fitness assays. African lineage ZIKV and post-epidemic Asian lineage ZIKV were mixed with pre-epidemic Asian lineage ZIKV at an approximate ratio of 1:1 respectively. The initial 1:1 ratios of mixed virus were confirmed by RT-PCR, followed by Sanger sequencing of replicons and polymorphic nucleotide peaks analysis. The ZIKV mixture was engorged by mosquitoes through membrane blood feeding or biting an infected A129 mouse at the viremia peak 3 days post-infection. The mosquitoes were sacrificed after 14 days of incubation, the ZIKV population amplified by RT-PCR, and the amplicon Sanger-sequenced. The blood and organs of infected mice were collected 3- or 8-days post-infection, respectively. All the mosquitoes and mouse specimens were subjected to RT-PCR amplification and Sanger sequencing to compare the ZIKV strain ratio after competition, and each point represents a single mosquito or mouse sample. Relative fitness values were compared among multiple competition replicates to determine if fitness of the competitors differed. **b**, Fitness comparison between African (Dakar 41525), Asian pre-epidemic (FSS13025) and American (PRVABC59) ZIKV strains in *A. aegypti*. The relative replicative fitness value  $w$  was analyzed according to  $w = (f_0/i_0)$ , where  $i_0$  is the initial ratio of the Dakar 41525 or PRVABC59 competitor to the FSS13025 strain, determined from Sanger sequence electropherogram peaks, and  $f_0$  is the final ratio. **c**, Fitness comparison of African (Dakar 41525), Asian pre-epidemic (FSS13025) and American (PRVABC59) ZIKV strains in mouse blood, using the same method as for panel b. **d**, Fitness comparison of African (Dakar 41525), Asian pre-epidemic (FSS13025) and American (PRVABC59) ZIKV strains in mosquitoes after feeding on the viremic mice shown in panel c, and extrinsic incubation, using the same method as for panel b. **b-d**, The distribution of the model-adjusted means is illustrated by catseye plots with shaded +/- standard errors overlaid by scatterplots of individual relative fitness values; scatterplots have been randomly jittered horizontally for clarity, and are shown on the log (base-10) scale such that comparisons are against a null value of 1.

655 **Figure 2. Four amino acids determine much of the fitness difference between different ZIKV strains in both mosquitoes and A129 mice.**

**a**, The hypothetical diagram of fitness changes following the spread of ZIKV from Africa to Asia and the Americas, including strains used for fitness assays. **b**, Schematic representation of competition fitness assay in mosquito bodies, legs and saliva. **c**, **e**, Fitness comparison between African and Asian lineage, and the four amino-acid substitution mutants (DK-4M and FSS-4M) in mosquito bodies, legs and saliva. The mosquitoes acquired the ZIKV mixture through membrane blood feeding and were assayed at 14 days post-infection. The body (carcass), legs and saliva were collected from each individual mosquito and subjected to RT-PCR amplification and Sanger sequencing to determine relative fitness values; each point represents a single mosquito or mouse sample. **d**, **f**, Competition between DK-WT and DK-4M (**d**), FSS-WT and FSS-4M (**f**) in mouse blood collected 3 days after infection. **g**, **h**, Fitness of DK-4M (**g**) and FSS-4M (**h**) in mosquitoes after oral infection from viremic mice. The mosquitoes acquired the virus through biting a viremic mouse 3 days after infection and were tested after 14 days of extrinsic incubation. **c-h**, The distribution of the model-adjusted means is illustrated by catseye plots with shaded +/- standard error bars overlaid by scatterplots of subject measures; scatterplots have been randomly jittered horizontally for clarity, and are shown on the log (base-10) scale such that comparisons are against a null value of 1.

675 **Figure 3. The fitness comparison of 4 individual mutant viruses against wild-type ZIKV strains in mosquitoes and A129 mice.**

680 **a-c**, The relative fitness of individual mutants in the Dakar strain, tested in mosquito bodies (**a**), legs (**b**) and saliva (**c**). **d-f**, The fitness comparison of individual reversion mutants in the FSS13025 strain, tested in mosquito bodies (**d**), legs (**e**) and saliva (**f**). **g,h**. Each point represents a single mosquito sample. The fitness comparison of DK-V188A (**g**) and FSS-A188V (**h**) versus wild-type strains in mouse blood. **i, j**, The fitness comparison of DK-V188A (**i**) and FSS-A188V (**j**) in mosquitoes after oral infection from viremic mice. **a-j**, The distribution of the model-adjusted means is illustrated by catseye plots with shaded +/- standard error overlaid by scatterplots of subject measures; scatterplots have been randomly jittered horizontally for clarity, and are shown on the log (base-10) scale such that comparisons are against a null value of 1.

**Figure 4. Fitness comparison of DK-4M and FSS-4M against wild-type ZIKV strains during a mosquito–host–mosquito transmission cycle.**

690 **a**, Schematic representation of the study design. 10 pfu of ZIKV WT and mutant viruses were intrathoracically injected into mosquitoes. After 6 days of extrinsic incubation, the infected mosquitoes fed on a A129 mice to transmit virus. Naïve mosquitoes were then employed to bite the infected A129 mice 3 days post-mouse infection. After an additional 14 days, the mosquitoes were harvested. All the mosquitoes and mice samples collected during the transmission cycle were analyzed by RT-PCR and Sanger sequencing. Each point represents a single mosquito or mouse sample. **b, c**, Fitness comparison of DK-4M (**b**) and FSS-4M (**c**) against wild-type viruses in mosquito salivary glands 6 days post-intrathoracic injection. **d, e**, Fitness of DK-4M (**d**) and FSS-4M (**e**) versus wild-type viruses in mouse blood. **f, g**, The fitness comparison of DK-4M (**f**) and FSS-4M(**g**) versus wild-type viruses in mosquitoes after oral infection from viremic mice. **b-g**, The distribution of the model-adjusted means is illustrated by catseye plots with shaded +/- standard error overlaid by scatterplots of subject measures; scatterplots have been randomly jittered horizontally for clarity, and are shown on the log (base-10) scale such that comparisons are against a null value of 1.

705 **Extended Data Figures and Tables**

**Extended Data Fig. 1. Phylogenetic analysis of representative ZIKV strains.**

710 **a**, Phylogenetic tree of representative Zika virus (ZIKV) strains based on 73 complete open reading frame sequences. The evolutionary distances were computed using the Maximum Composite Likelihood method. The percentage of replicate trees in which the associated taxa clustered together in the bootstrap tests were shown next to the branches (1000 replicates). Evolutionary analyses were performed in MEGA X, by using the Maximum Likelihood method. **b**, Four reversion directly reverting mutations compared among representative African, Asian and American lineage strains.

715 **Extended Data Fig. 2. The trace history of four directly reverting amino acids in the evolutionary tree of Zika virus.**

720 Trace history of four ZIKV amino acids performed in Mesquite (Version 3.61, <http://www.mesquiteproject.org>). These include: **a**. Amino acid 106 substitution of the capsid protein; **b**. Amino acid 1 of the pre-membrane (prM) protein; **c**. amino acid 188 of the nonstructural protein 1 (NS1), and; **d**. amino acid 872 of the nonstructural protein 5 (NS5) based on 73 complete zika virus open reading frame sequences.

**Extended Data Fig. 3. ZIKV WT and 4M mutant strain had a similar initial ratio when titrated on mammalian or insect cells, or estimated by the Sanger sequencing method.**

725 The initial ratio of DK-WT/DK-4M (**a**) and FSS-WT/FSS-4M (**b**) were calculated by the virus titer determined on Vero and C6/C36 cells or by the electropherogram peak height based on Sanger sequencing result. The titers of the WT and mutant viruses were determined by FFA (Focus-forming assay) on the cells before they were mixed. The virus mixture of WT and mutant viruses were determined by Sanger sequencing of RT-PCR amplicons.

730

**Extended Data Fig. 4. Fitness comparisons with additional Zika virus strains Dominican Republic *Aedes aegypti* mosquitoes.**

735 **a**, The fitness of 2 African ZIKV strains (DK 41662) and (DK 41671) in competition with the Asian FSS13025 strain in mosquitoes. **b**, The fitness of 2 American ZIKV strains (R114916) and (HN-MF59) in competition with the FSS13025 Asian strain in mosquitoes. **c**. The fitness of ZIKV African strain Dakar 41525, Asian pre-epidemic strain FSS13025 strain and American strain PRVABC59 in a low generation (F6) colonized *A. aegypti* strain from the Dominican Republic. Each point represents a single mosquito or mouse sample **a-c**, The distribution of the model-adjusted means is illustrated by catseye plots with shaded +/- standard error overlaid by scatterplots of subject measures; scatterplots have been randomly jittered horizontally for clarity, and are shown on the log (base-10) scale such that comparisons are against a null value of 1.

740

745 **Extended Data Fig. 5. Fitness comparisons of African and post-epidemic against a pre-epidemic ZIKV strains in different organs of A129 mice.**

**a**, Fitness comparison between African (Dakar 41525) and Asian pre-epidemic (FSS13025) ZIKV strains in different organs of A129 mice after 8 days of infection, when viremia had ended. **b**, The fitness comparison between Asian pre-epidemic (FSS13025) and American

750 (PRVABC59) ZIKV strains in different organs of A129 mice after 8 days of infection, when viremia had ended. Each point represents a single mouse sample **a, b**, The distribution of the model-adjusted means is illustrated by catseye plots with shaded +/- standard error overlaid by scatterplots of subject measures; scatterplots have been randomly jittered horizontally for clarity, and are shown on the log (base-10) scale such that comparisons are against a null value of 1. \*  $P < 0.05$ , \*\*  $P < 0.01$ , \*\*\*  $P < 0.001$ .

755

**Extended Data Fig. 6. Fitness comparison of African and post-epidemic against a pre-epidemic ZIKV stain in human primary cells.**

760 **a**, Schematic representation of the study design. The mixed ZIKVs were inoculated into human fibroblast and keratinocyte cells. The RNAs in the culture supernatant were isolated, amplified by RT-PCR, Sanger-sequenced 3 days post infection. **b, c**, The fitness of ZIKV African strain (Dakar 41525), Asian pre-epidemic (FSS13025) strain and American strain (PRVABC59) in human primary fibroblast (**b**) and keratinocyte (**c**) cells. Each point represents a single culture sample The distribution of the model-adjusted means is illustrated by catseye plots with shaded +/- standard error overlaid by scatterplots of subject measures; scatterplots have been randomly jittered horizontally for clarity, and are shown on the log (base-10) scale such that comparisons are against a null value of 1.

765

**Extended Data Fig. 7. Fitness comparisons of Dakar-4 amino-acid mutant and FSS13025-4 amino-acid mutant against wild-type viruses in different organs of A129 mice.**

770 **a**, Fitness comparison between Dakar 4-amino acid mutant (DK-4M) and the wild-type strain in different organs of A129 mice. **b**, The fitness comparison between FSS 4 amino-acid mutant (FSS-4M) and wild-type strain in different organs of A129 mice. Each point represents a single mouse sample. **a, b**, The distribution of the model-adjusted means is illustrated by catseye plots with shaded +/- standard error overlaid by scatterplots of subject measures; scatterplots have been randomly jittered horizontally for clarity, and are shown on the log (base-10) scale such that comparisons are against a null value of 1. \*  $P < 0.05$ , \*\*  $P < 0.01$ , \*\*\*  $P < 0.001$ , n.s. not significant.

775

**Extended Data Fig. 8. Fitness comparisons of Dakar-4 amino-acid mutant and FSS13025-4 amino-acid mutant versus wild-type ZIKV strains in human primary cells.**

780 **a, b**, Fitness comparison between Dakar 4-amino acid mutant (DK-4M) and wild-type strain in human primary fibroblast (**a**) and keratinocyte (**b**) cells. **c, d**, The fitness comparison between FSS13025 4-amino acid mutant (FSS-4M) and wild-type strain in human primary fibroblast (**c**) and keratinocyte (**d**) cells. Each point represents a single culture sample. **a-d**, The distribution of the model-adjusted means is illustrated by catseye plots with shaded +/- standard error overlaid by scatterplots of subject measures; scatterplots have been randomly jittered horizontally for clarity, and are shown on the log (base-10) scale such that comparisons are against a null value of 1.

785

790 **Extended Data Fig. 9. Fitness comparison between NS1-188 mutants against wild-type ZIKV strains in different organs of A129 mice.**

**a**, Fitness comparison between Dakar NS1-V188A mutant and wild-type strain in different organs of A129 mice. **b**, Fitness comparison between FSS13025 NS1-A188V mutant and wild-

795 type strain in different organs of A129 mice. Each point represents a single mouse sample **a, b**,  
The distribution of the model-adjusted means is illustrated by catseye plots with shaded +/-  
standard error overlaid by scatterplots of subject measures; scatterplots have been randomly  
jittered horizontally for clarity, and are shown on the log (base-10) scale such that comparisons  
are against a null value of 1. \*  $P < 0.05$ , \*\*  $P < 0.01$ , \*\*\*  $P < 0.001$ , n.s. not significant.

800 **Extended Data Fig. 10. Fitness comparison between African-4 amino-acid mutant and  
FSS13025-4 amino-acid mutant against wild-type viruses during mosquito-mouse-  
mosquito transmission cycle.**

805 **a**, Fitness comparison between Dakar 4-amino acid mutant (DK-4M) and wild-type strain in  
different organs of A129 mice after being bitten by infected mosquitoes. **b**, Fitness comparison  
between FSS 4-amino acid mutant (FSS-4M) and wild-type strain in different organs of A129  
mice biting by infected mosquitoes. Each point represents a single mosquito or mouse sample  
**a, b**, The distribution of the model-adjusted means is illustrated by catseye plots with shaded +/-  
standard error overlaid by scatterplots of subject measures; scatterplots have been randomly  
jittered horizontally for clarity, and are shown on the log (base-10) scale such that comparisons  
810 are against a null value of 1. \*  $P < 0.05$ , \*\*  $P < 0.01$ , \*\*\*  $P < 0.001$ .

**Extended Data Table 1. The relative replicative fitness of ZIKV mutant strains in  
mosquitoes, mice and human primary cells.**

815 The relative replicative fitness of ZIKV mutant strains in mosquitoes, mice and human primary  
cells, derived from the data in the figures, are presented as the final ratio divided by the initial  
ratio of the two competing viruses, as used previously to compare adaptive chikungunya virus  
mutations<sup>36</sup>. P values are based on differences from equal fitness or a relative fitness value of 1.

820 **Extended Data Table 2. Primers and probes for gene cloning, qPCR, RT-PCR and Sanger  
sequencing.**



**A**

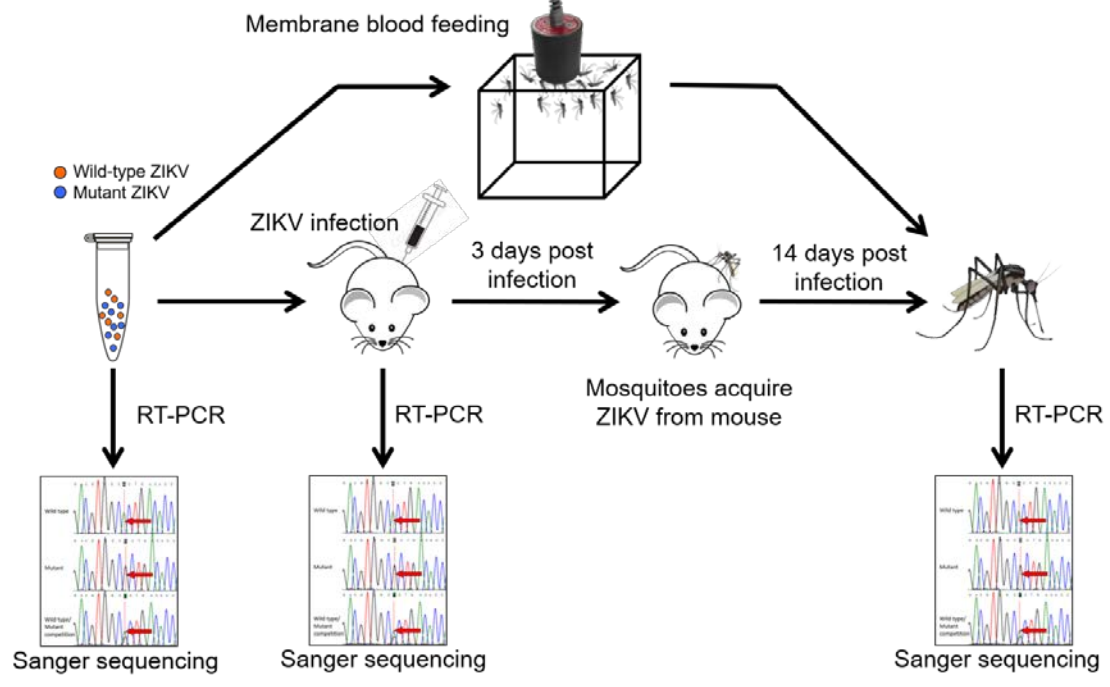

**B**

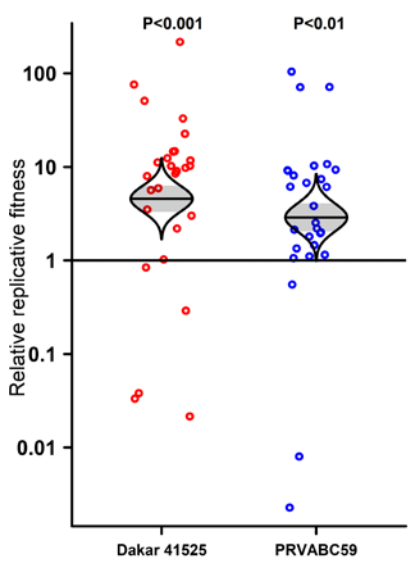

**C**

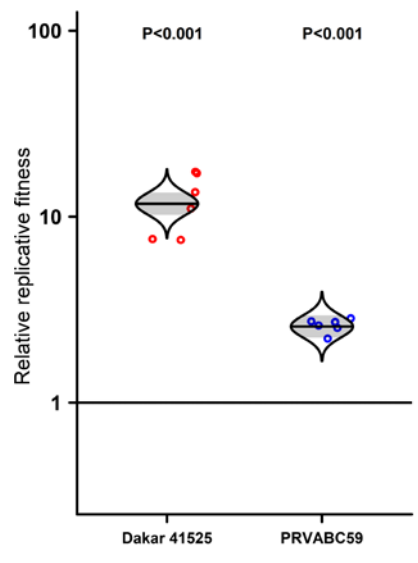

**D**

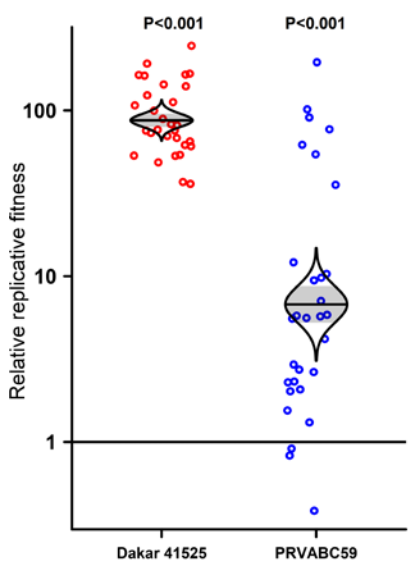

**Fig. 1**

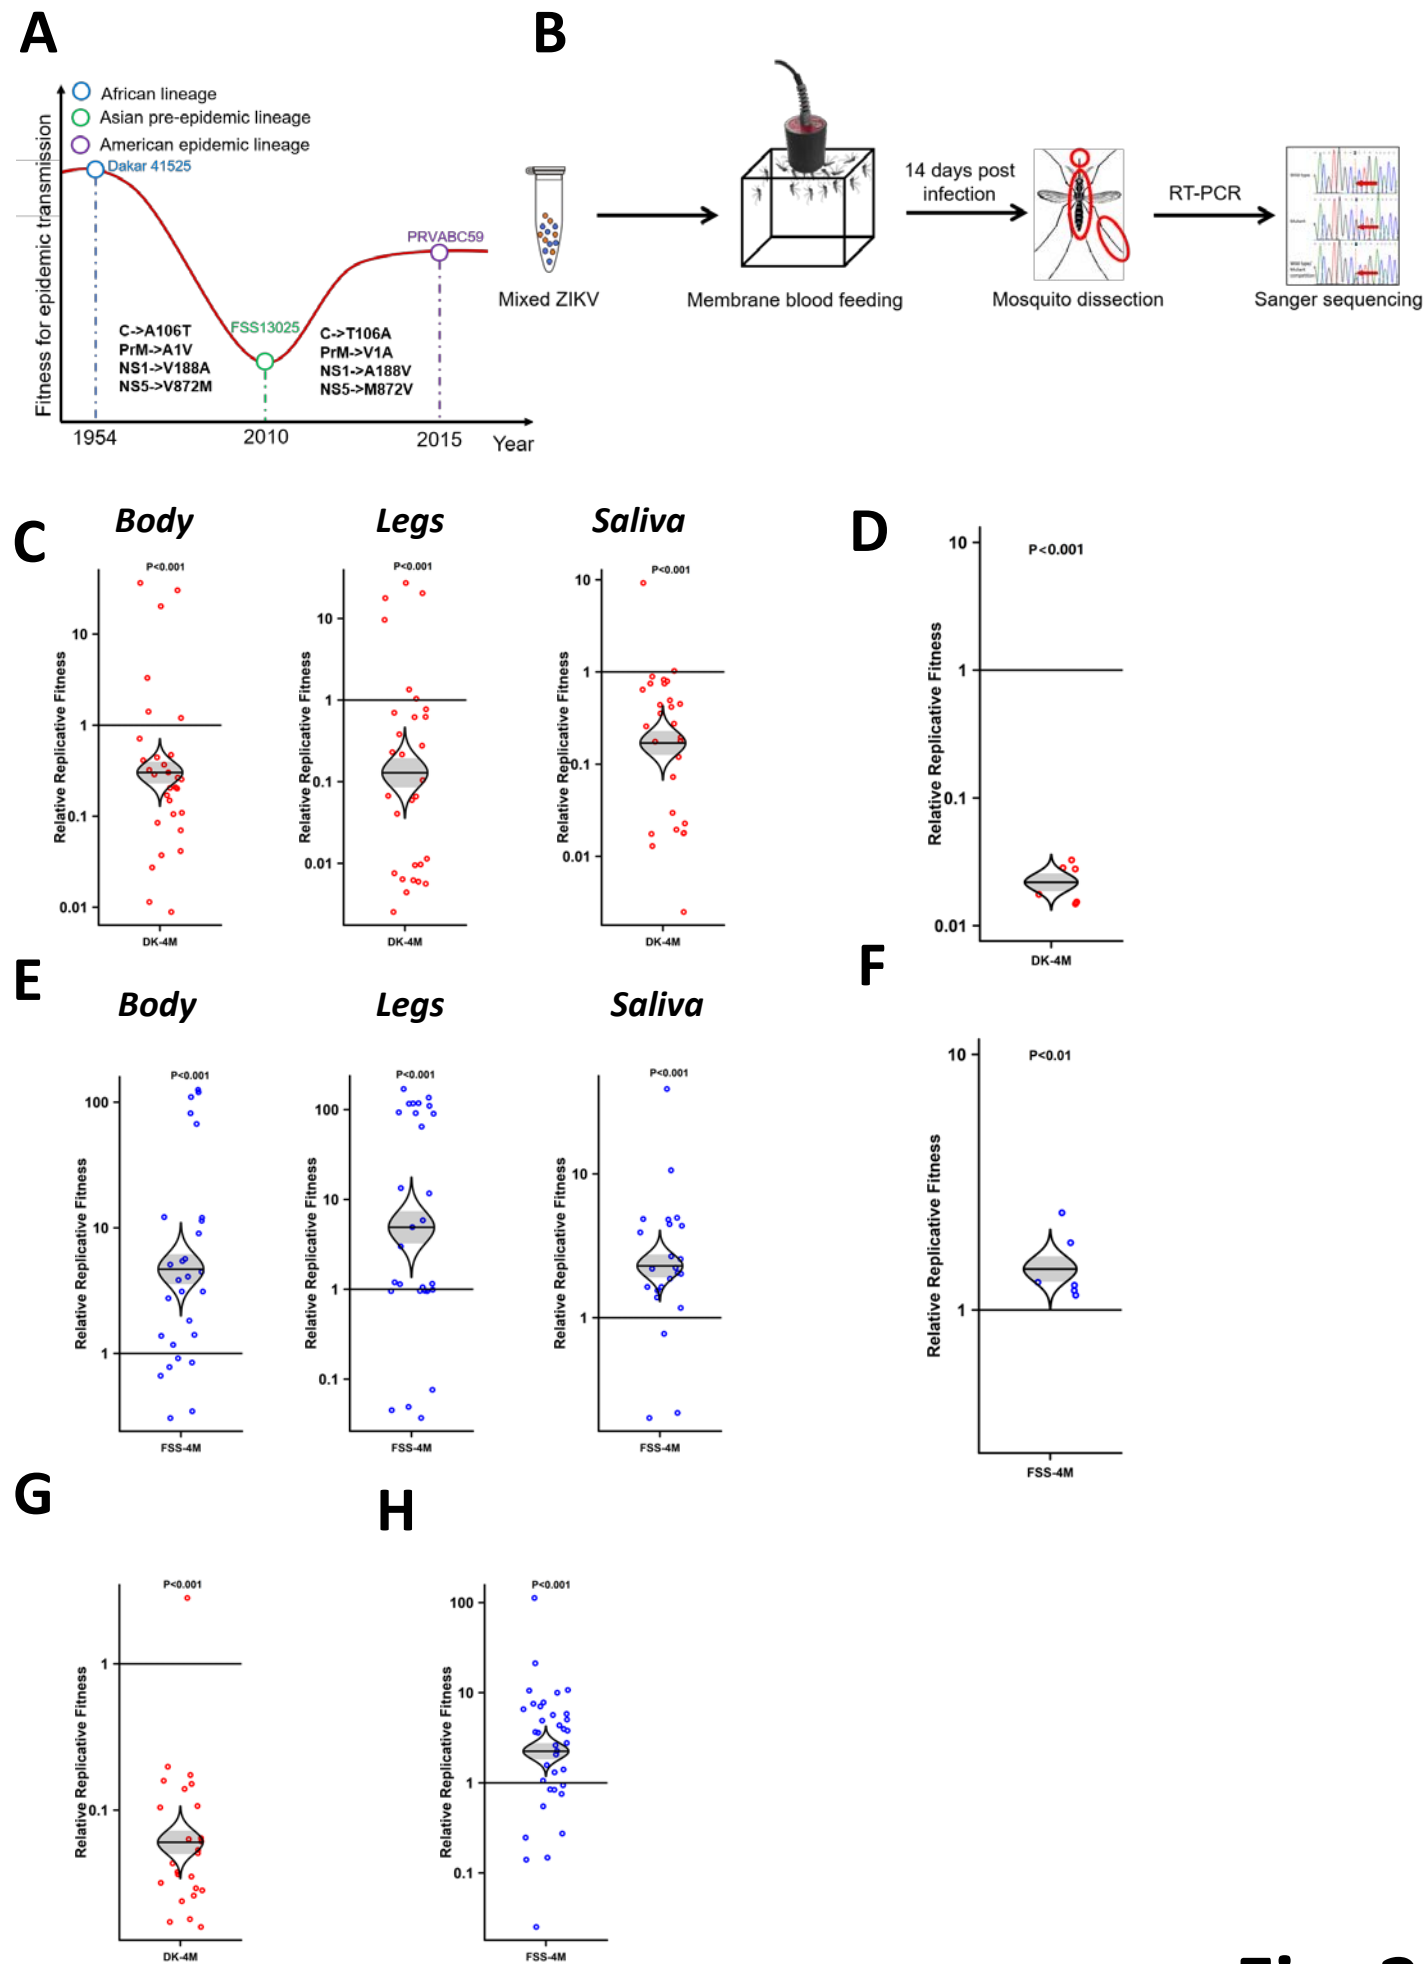

**Fig. 2**

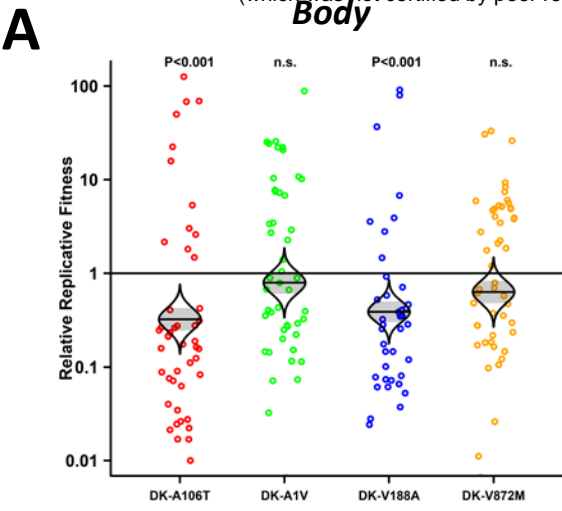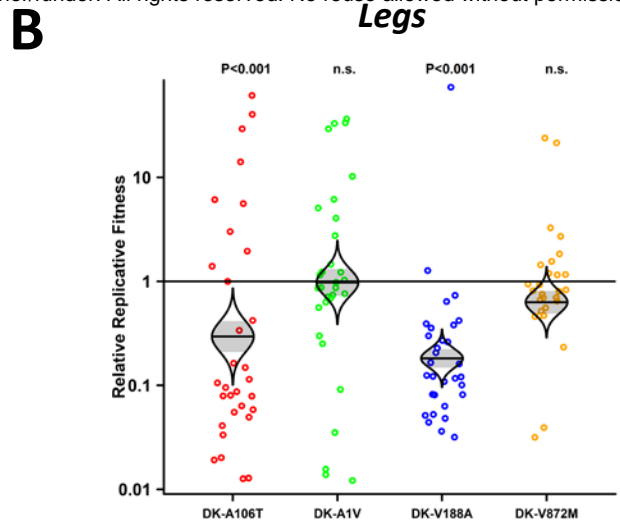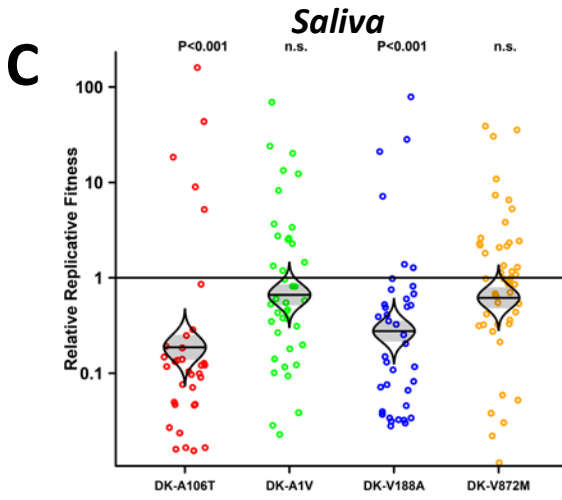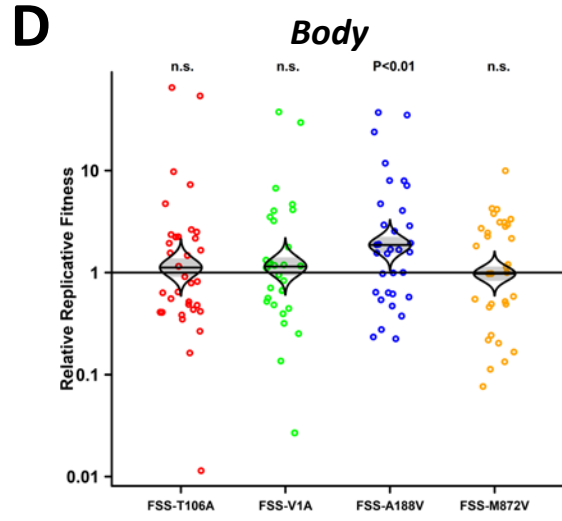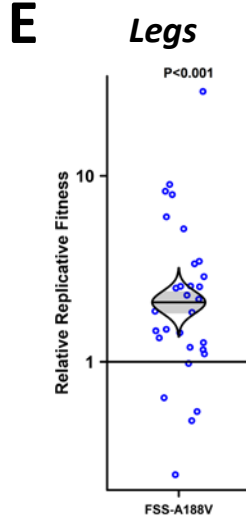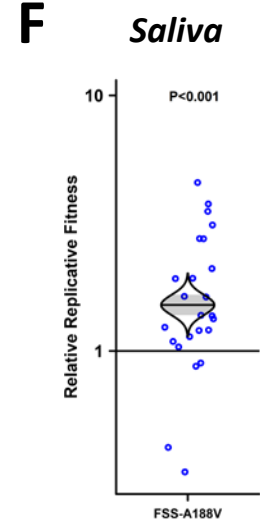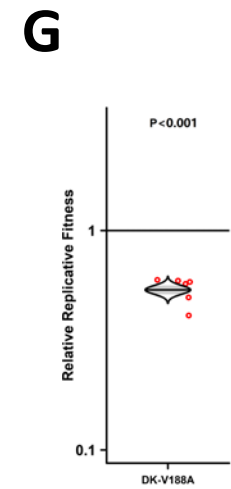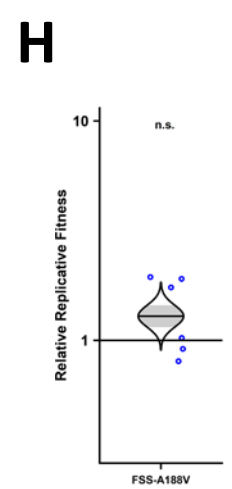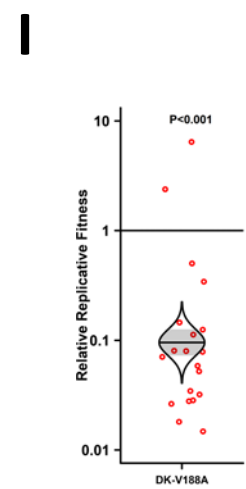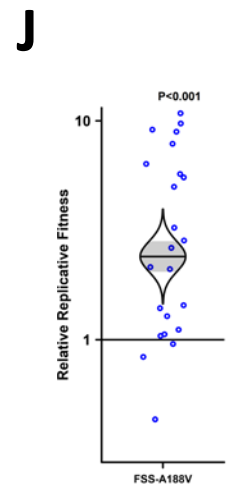

**Fig. 3**

**A**

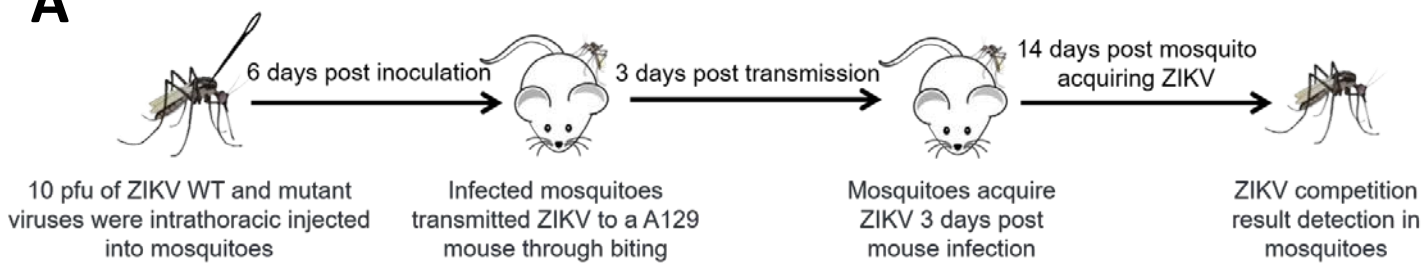

**B**

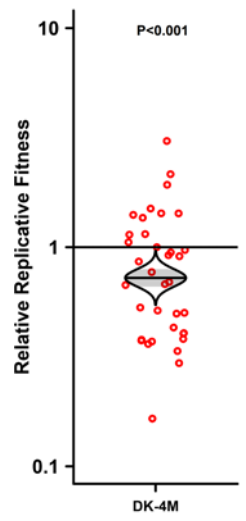

**C**

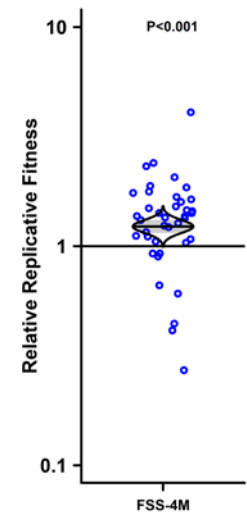

**D**

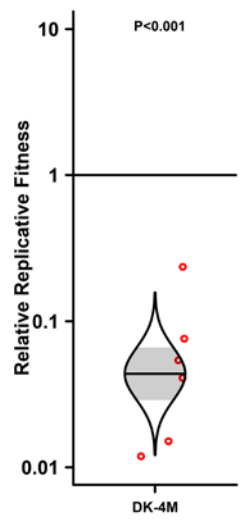

**E**

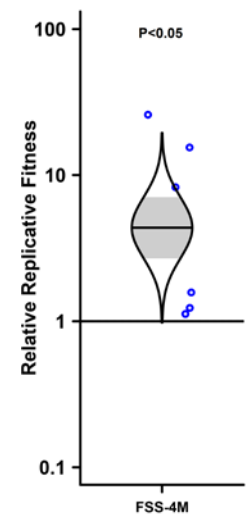

**F**

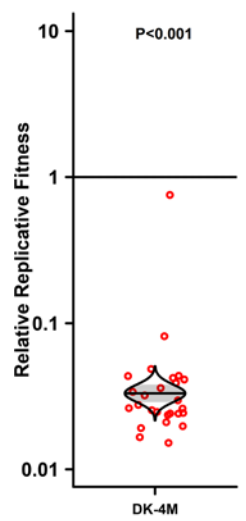

**G**

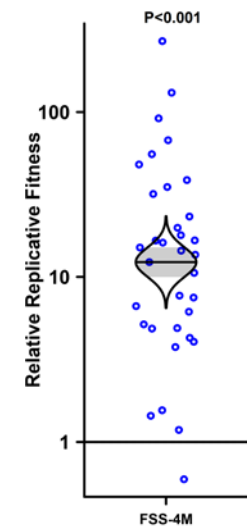

**Fig. 4**

**A**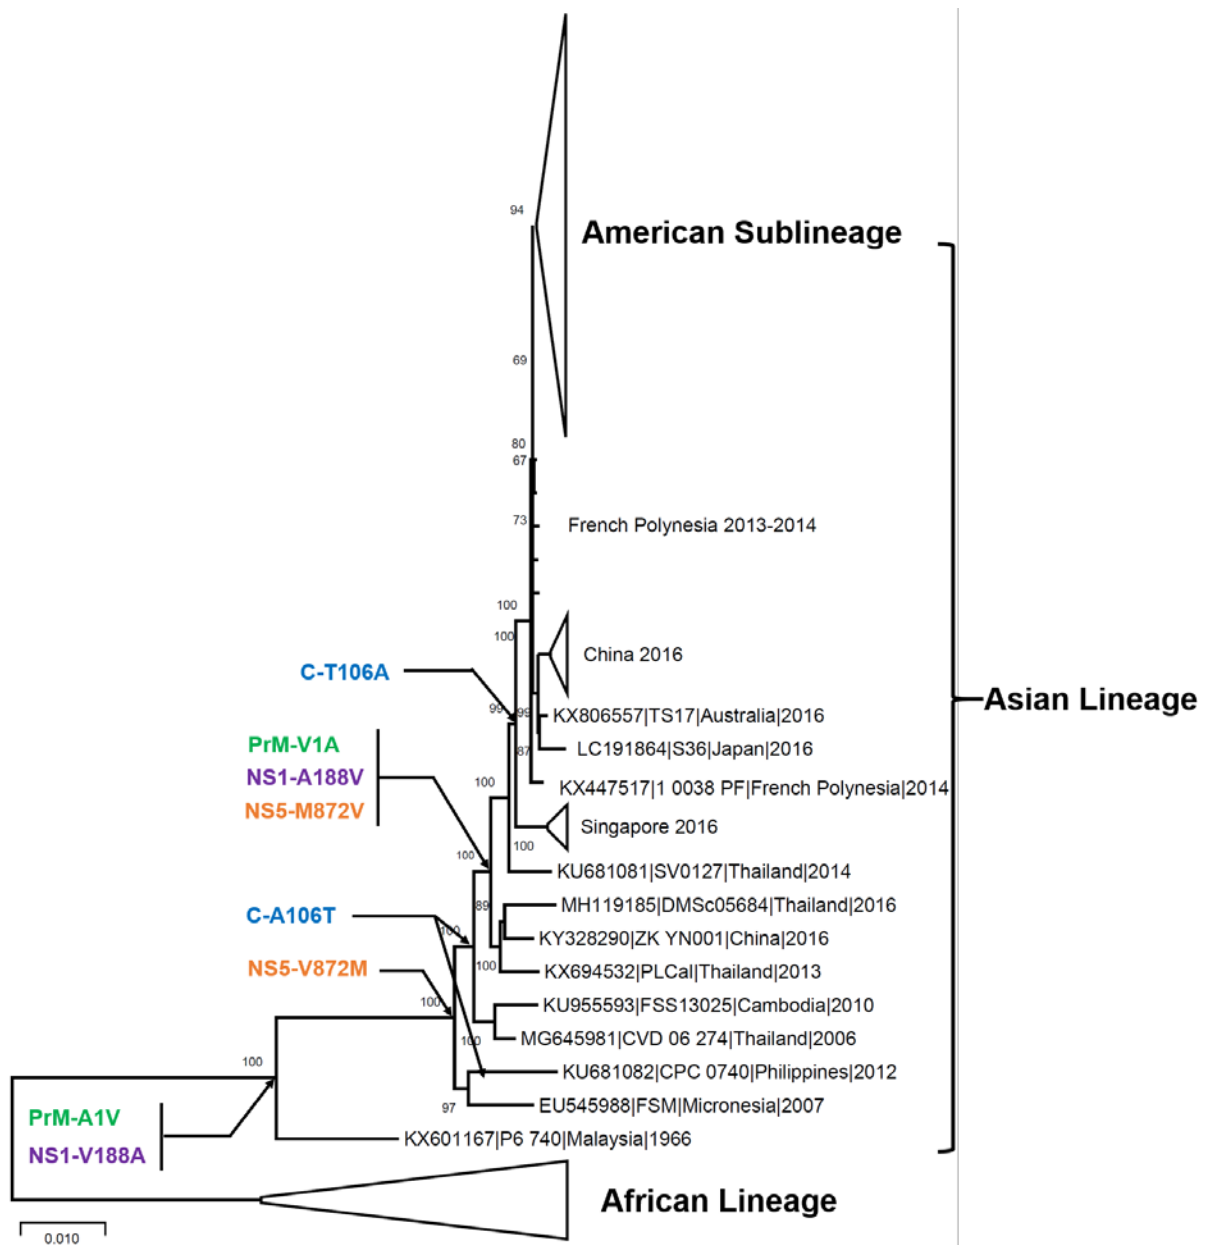**B**

| Position |            | African Lineage |            | Asian Lineage (Pre-epidemic) |            | Asian Lineage (American) |            |
|----------|------------|-----------------|------------|------------------------------|------------|--------------------------|------------|
| Gene     | Amino acid | Codon           | Amino acid | Codon                        | Amino acid | Codon                    | Amino acid |
| Capsid   | 106        | GCT             | A          | ACA                          | T          | GCA                      | A          |
| PrM      | 1          | GCC             | A          | GTG                          | V          | GCG                      | A          |
| NS1      | 188        | GTC             | V          | GCT                          | A          | GTT                      | V          |
| NS5      | 872        | GTG             | V          | ATG                          | M          | GTG                      | V          |

**Extended Data Figure 1**

**A**

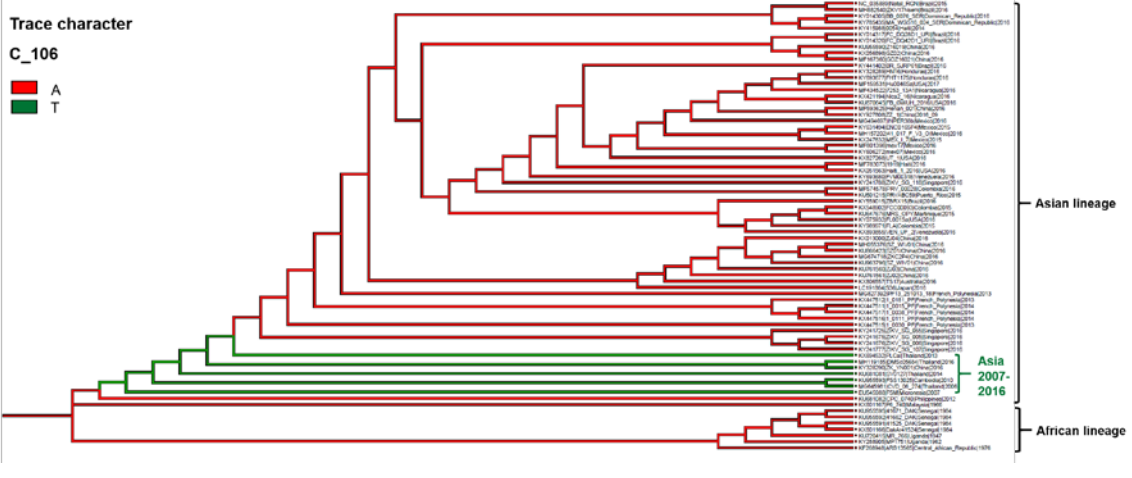

**B**

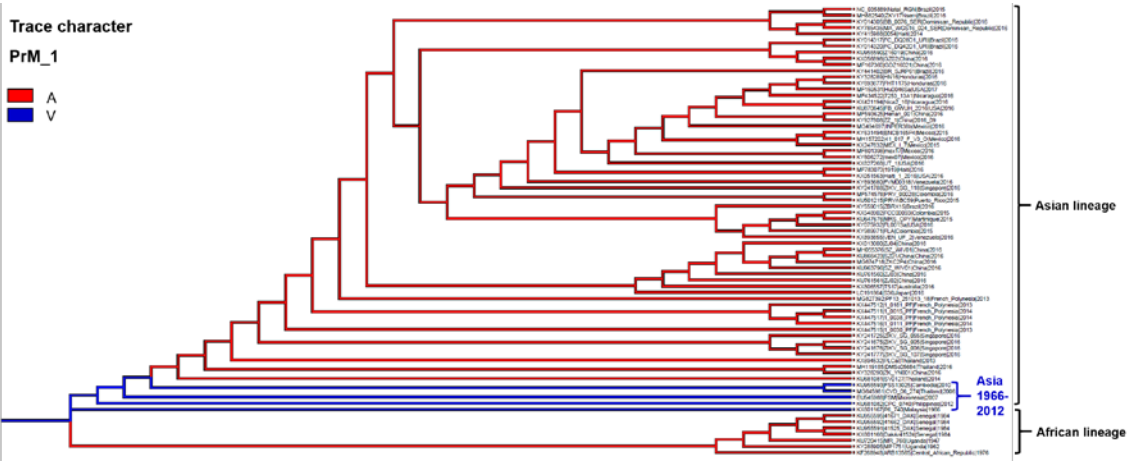

**C**

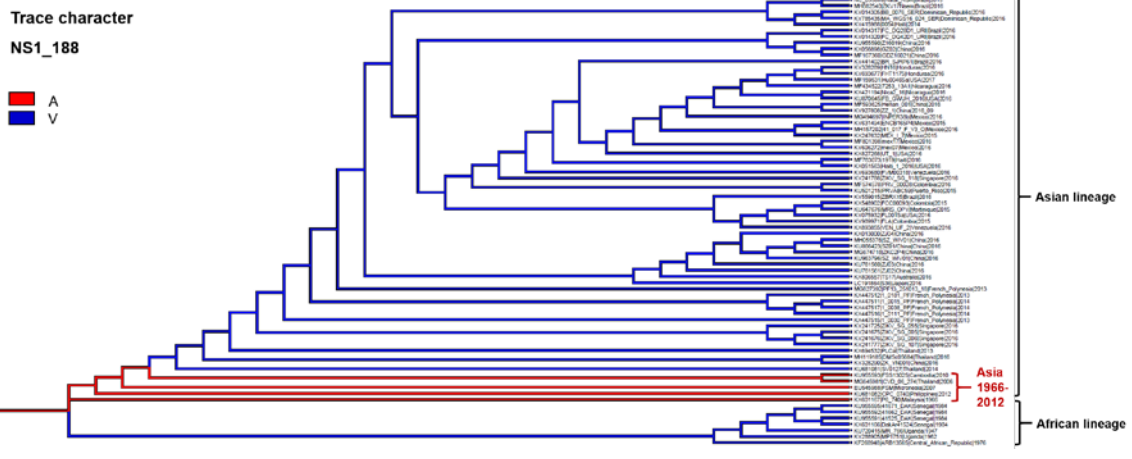

**D**

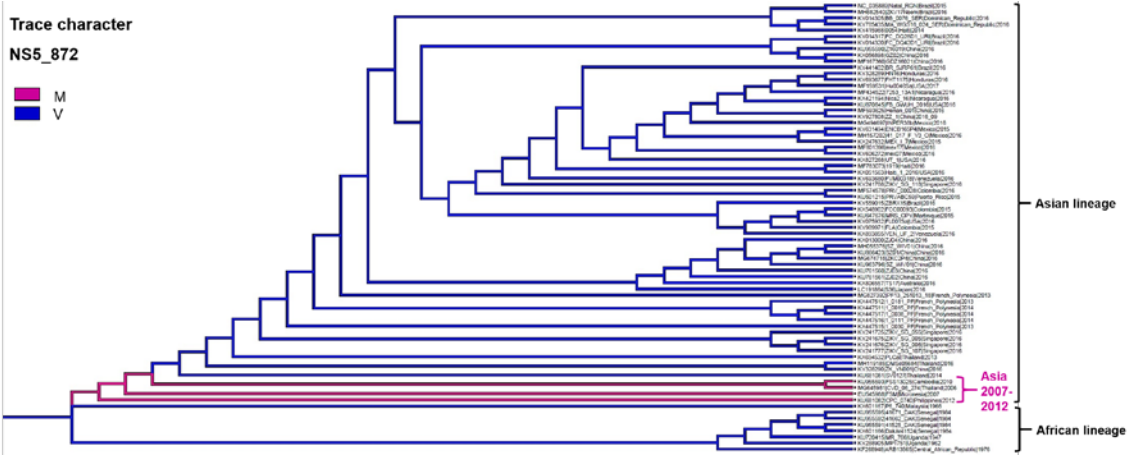

**Extended Data Figure 2**

**a**

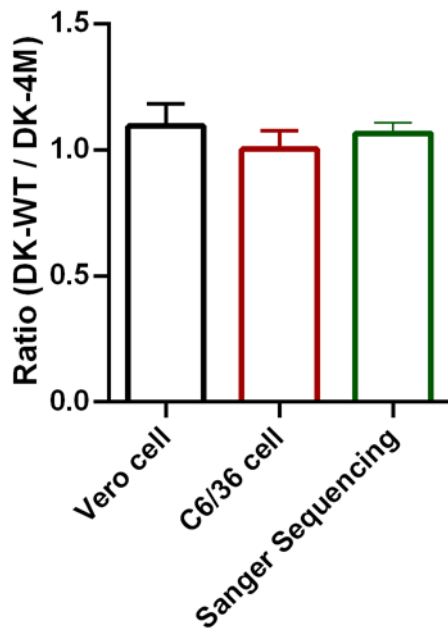

**b**

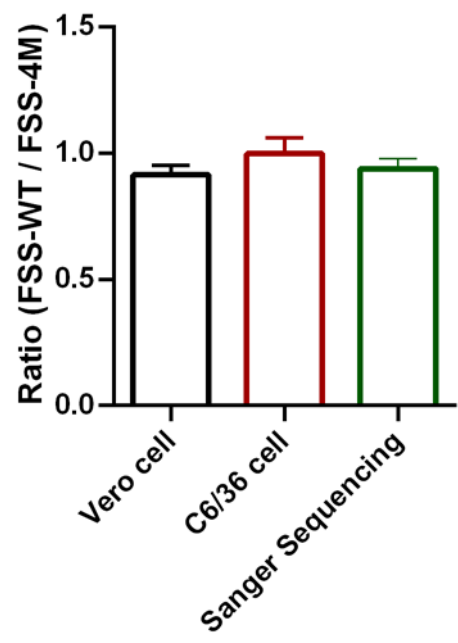

**A**

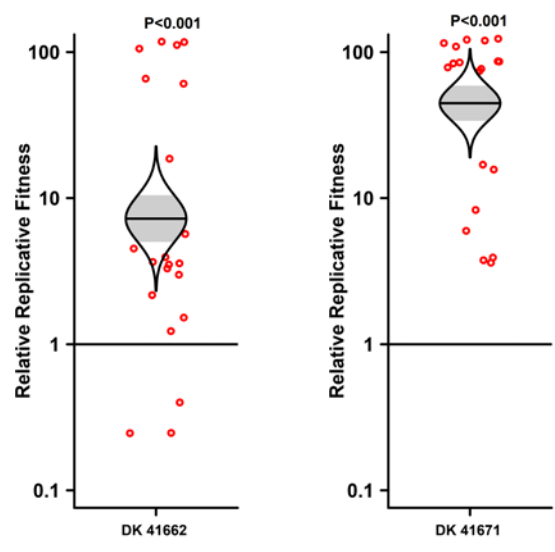

**B**

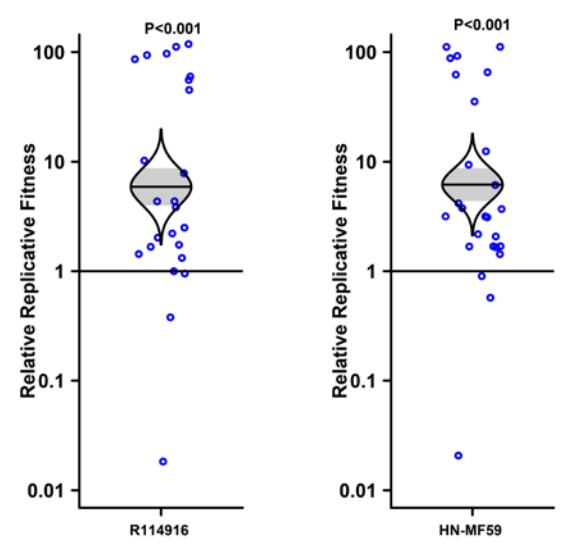

**C**

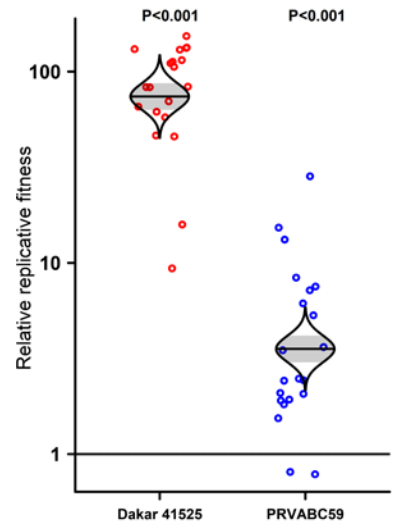



**A**

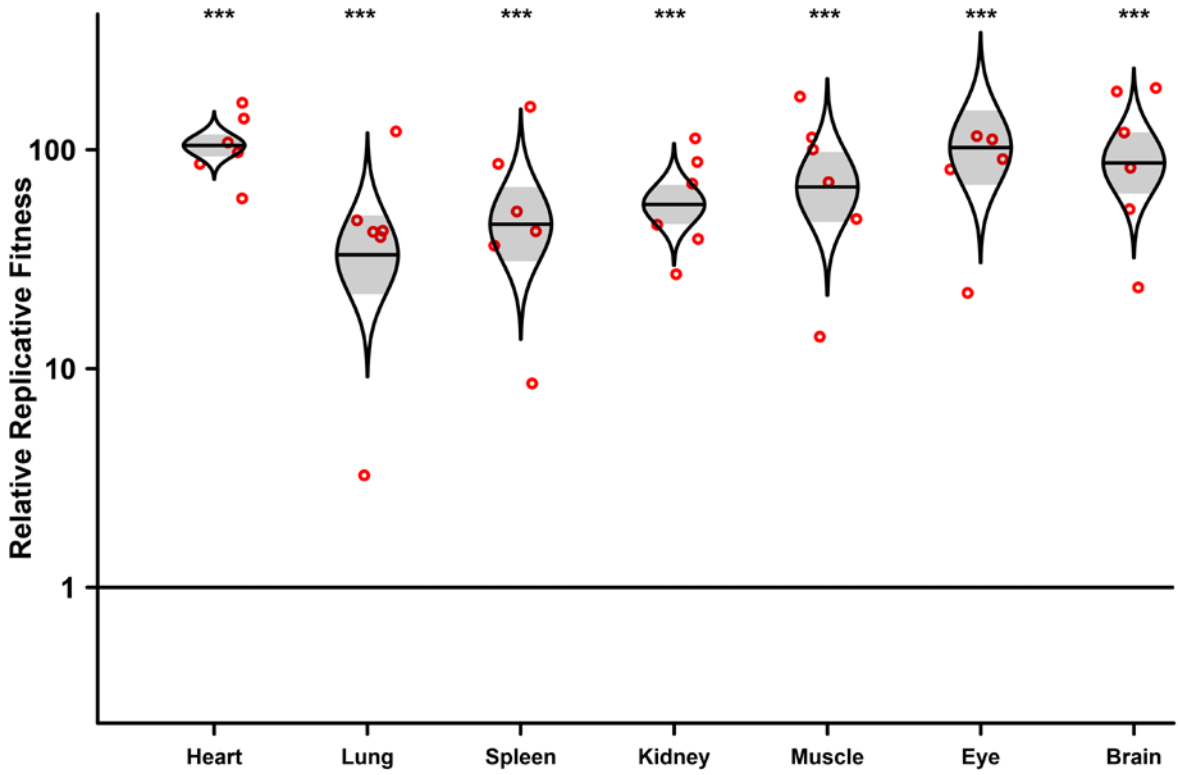

**B**

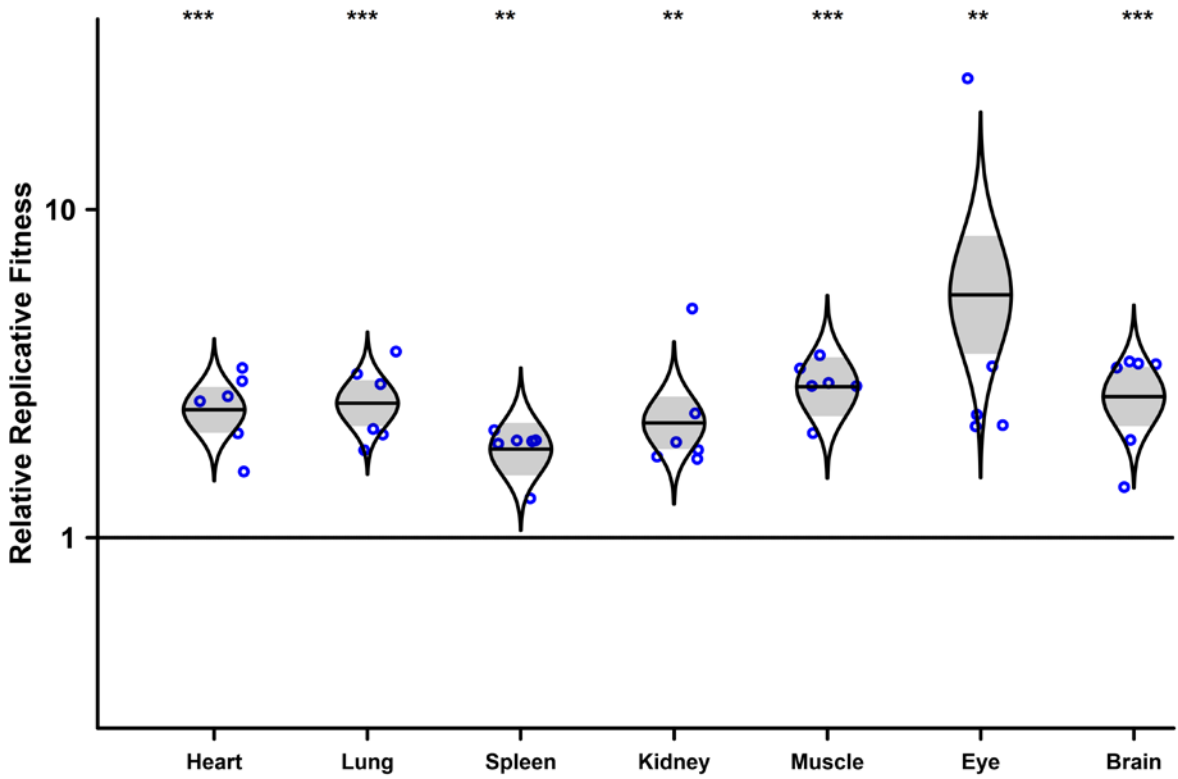

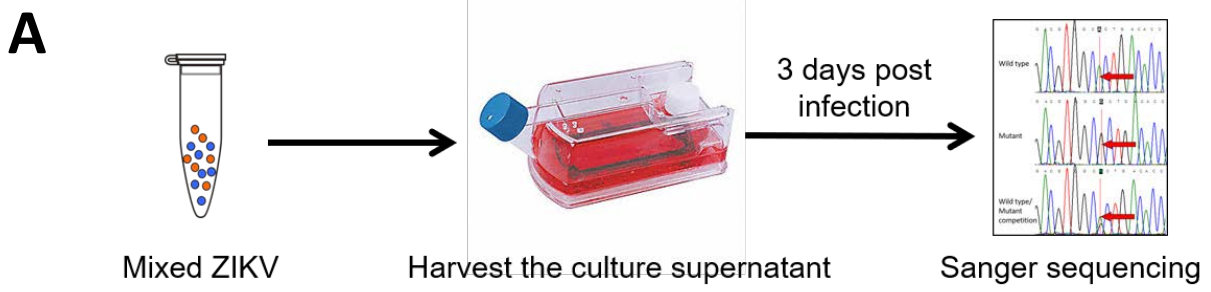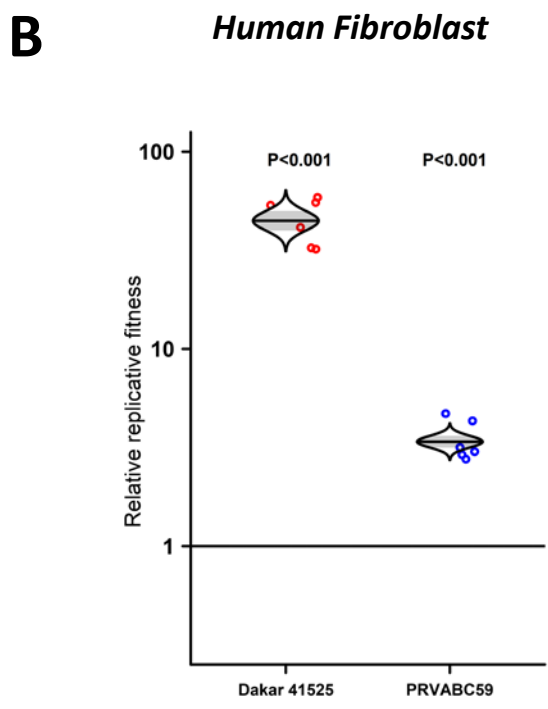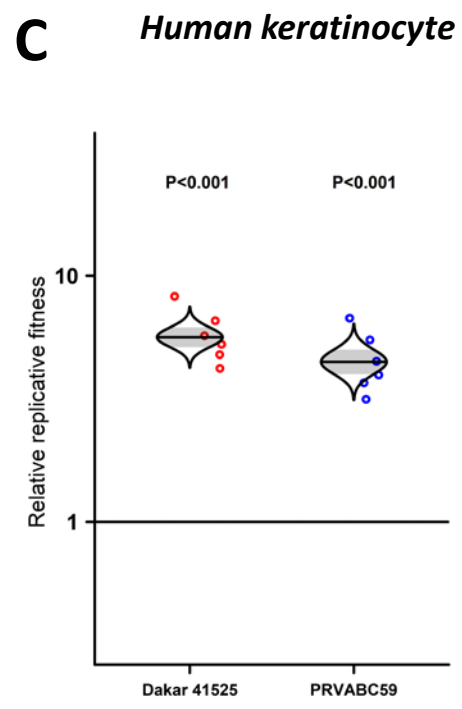

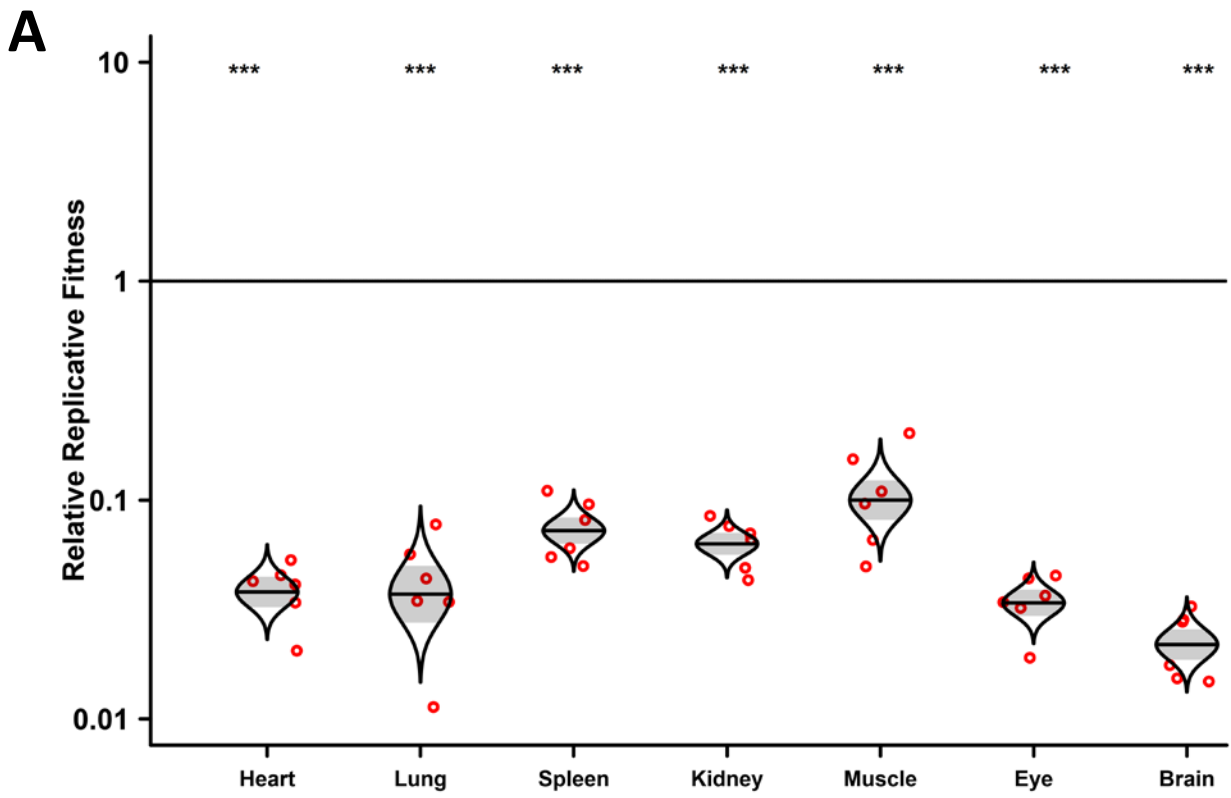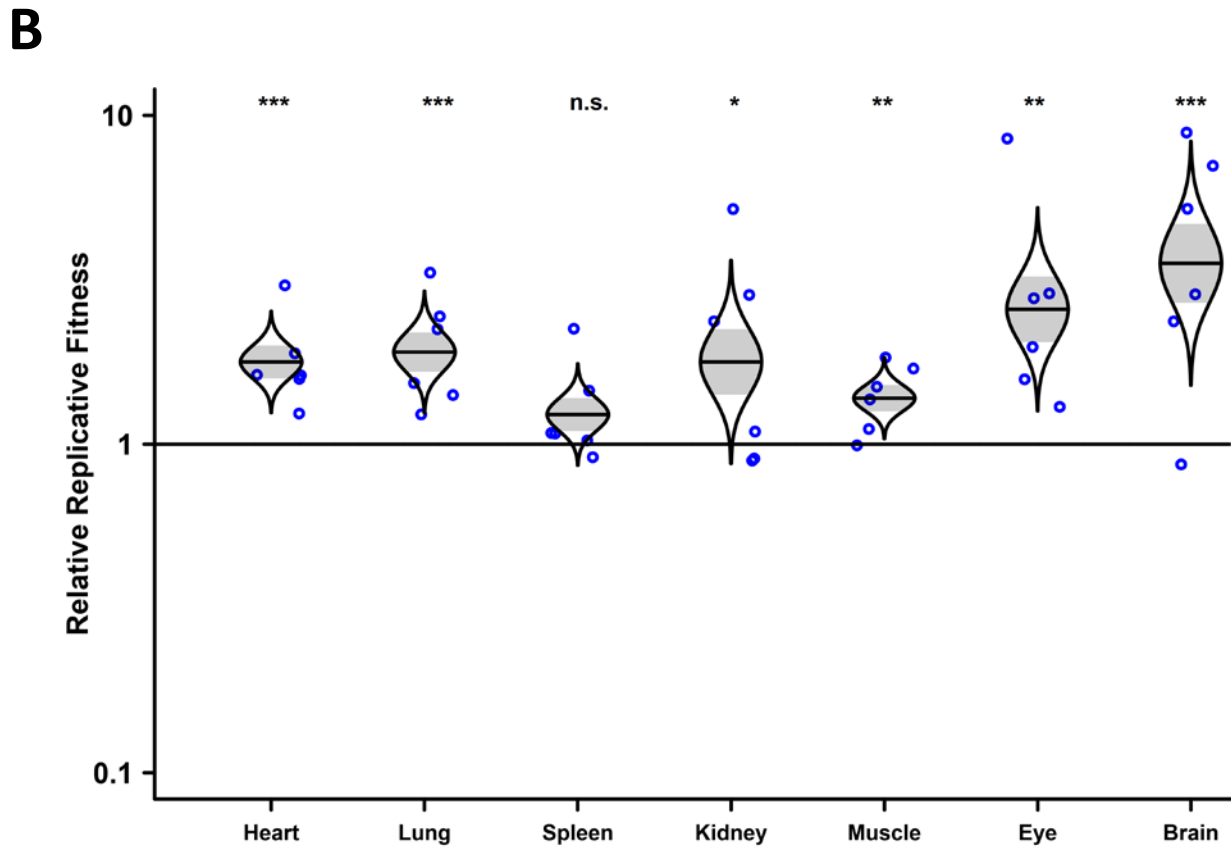

**Extended Data Figure 7**

**A**

*Human Fibroblast*

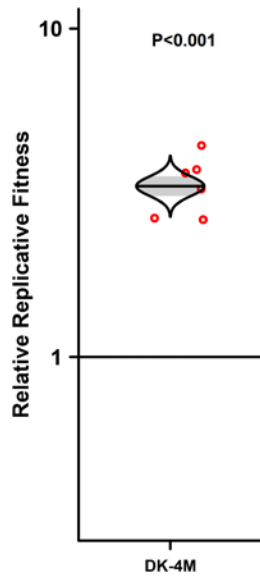

**B**

*Human keratinocyte*

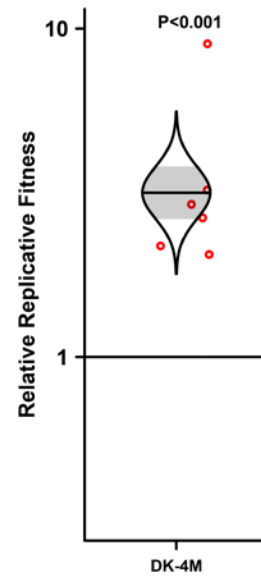

**C**

*Human Fibroblast*

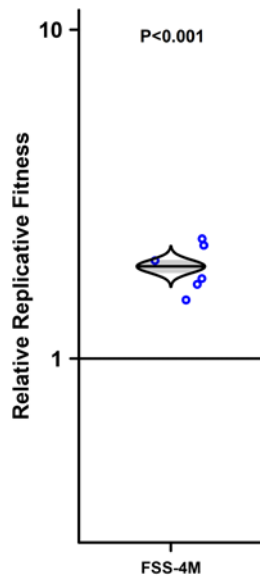

**D**

*Human keratinocyte*

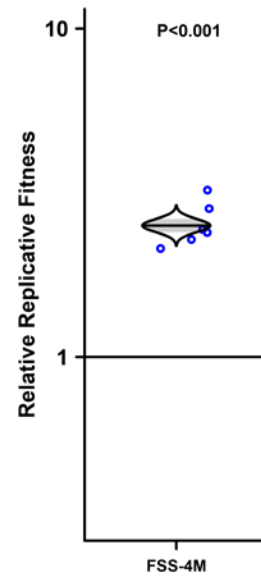

**Extended Data Figure 8**

**A**

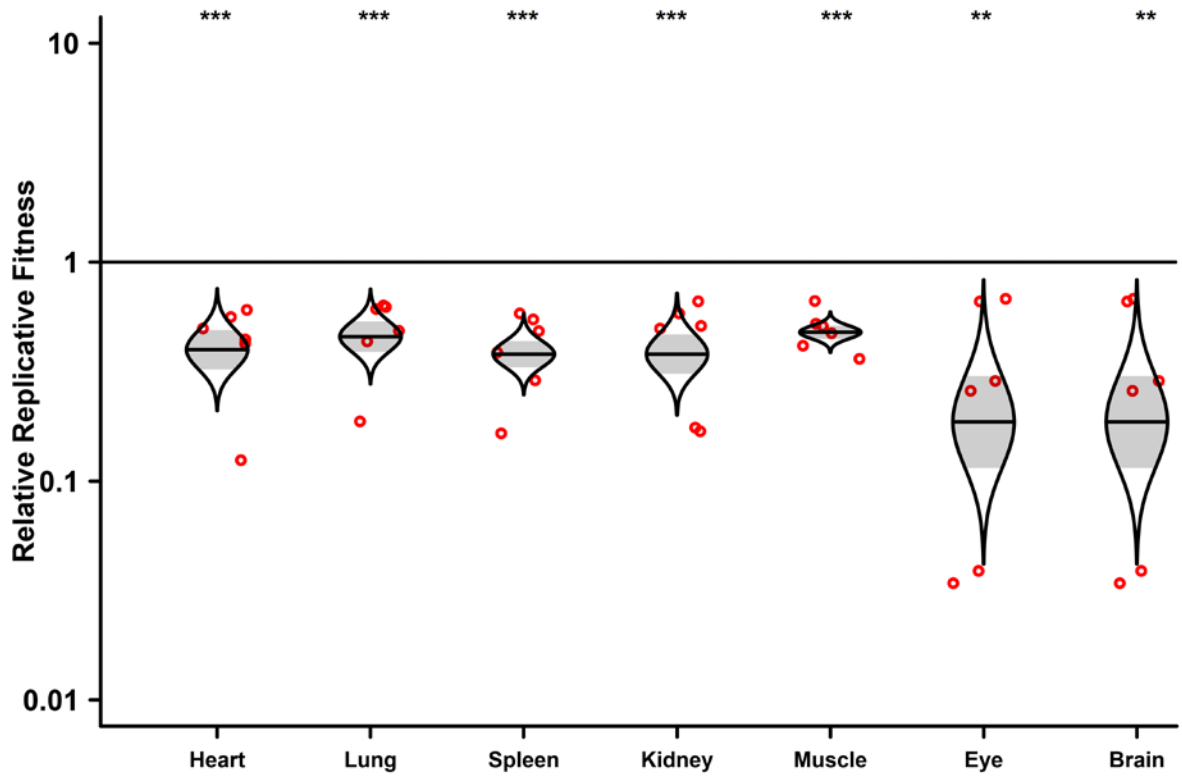

**B**

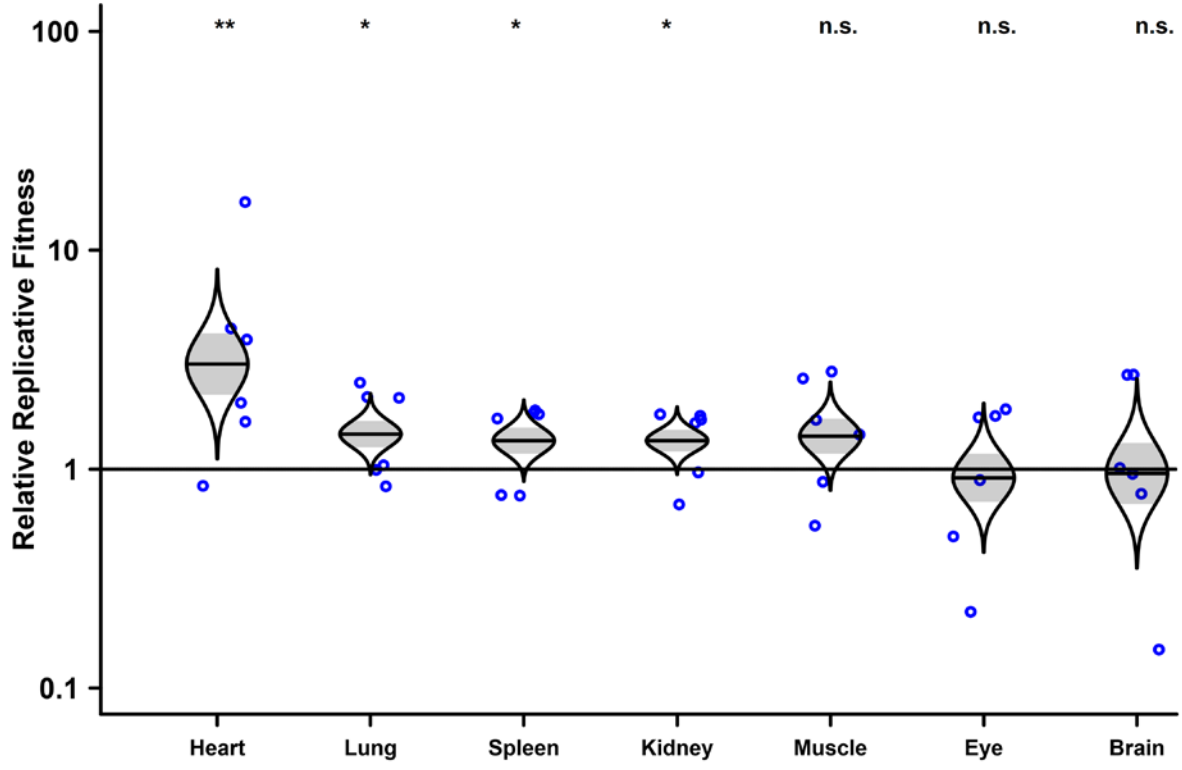

**Extended Data Figure 9**

**A**

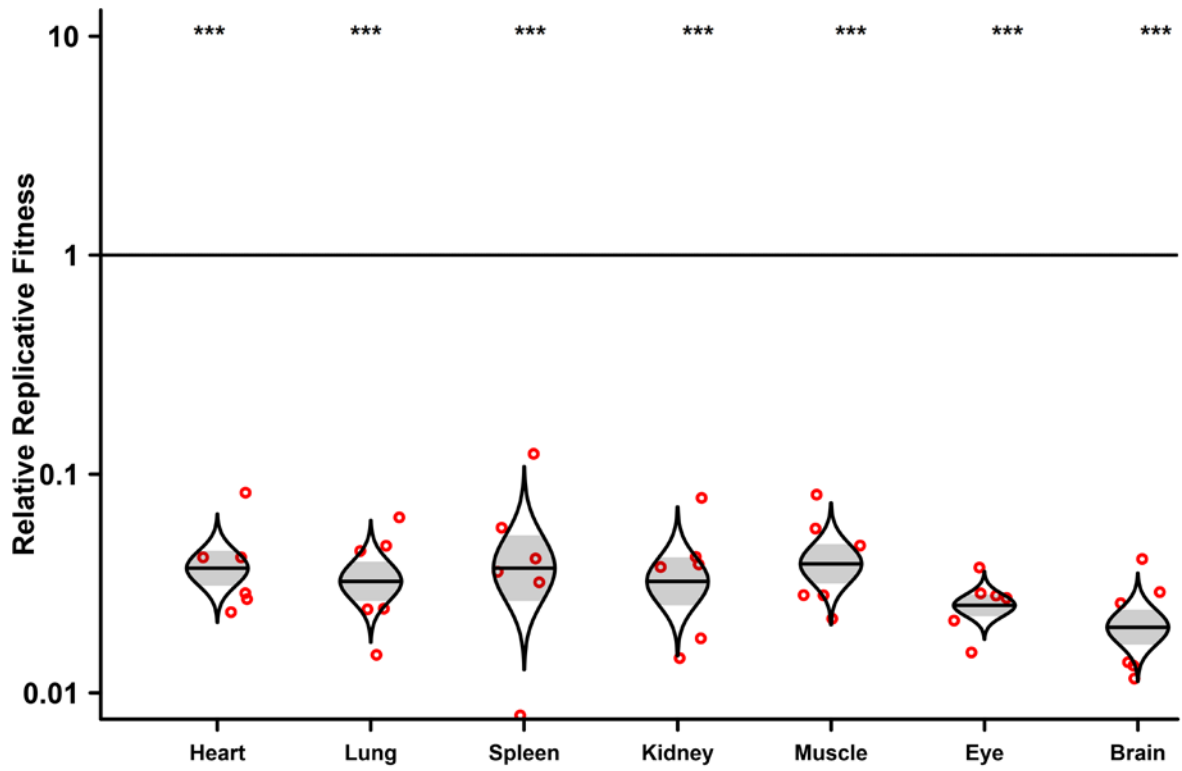

**B**

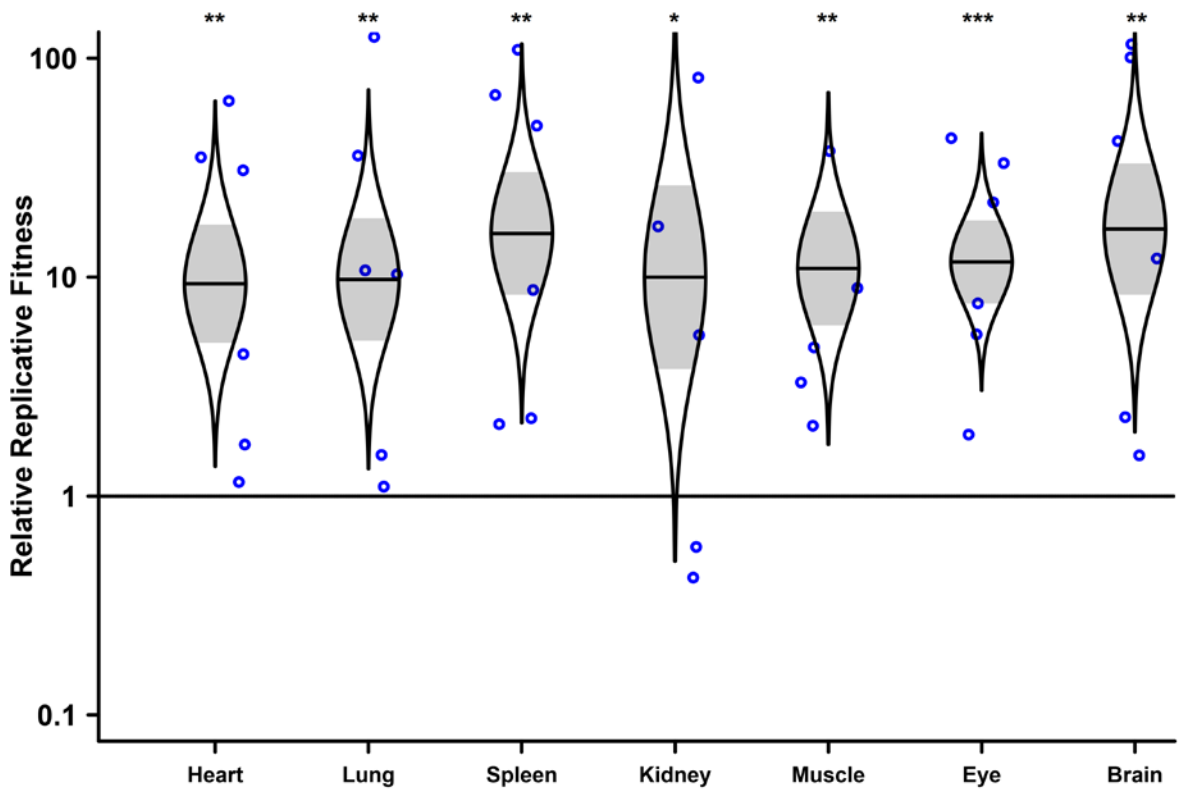

**Extended Data Figure 10**

**Extended Data Table 1. The relative replicative fitness<sup>a</sup> of ZIKV mutant strains in mosquitoes, mice and human primary cells.**

| Virus backbone          | Virus competition    | Mosquito body | Mosquito leg | Mosquito saliva | Mouse serum | Human Keratinocyte | Human Fibroblast |
|-------------------------|----------------------|---------------|--------------|-----------------|-------------|--------------------|------------------|
| Dakar virus backbone    | FSS13025/Dakar 41525 | 0.4*          |              |                 | 0.1***      | 0.1***             | 0.02***          |
|                         | DK-4M/DK-WT          | 0.4***        | 0.3***       | 0.3***          | 0.2**       | 0.3***             | 0.3***           |
|                         | DK-A106T/DK-WT       | 0.4*          | 0.5*         | 0.3**           |             |                    |                  |
|                         | DK-A1V/DK-WT         | 1.0           | 1.1          | 0.8             |             |                    |                  |
|                         | DK-V188A/DK-WT       | 0.4*          | 0.2**        | 0.4*            | 0.5*        |                    |                  |
|                         | DK-V872M/DK-WT       | 0.9           | 0.7          | 0.8             |             |                    |                  |
| FSS13025 virus backbone | PRVABC59/FSS13025    | 2.0*          |              |                 | 2.7***      | 3.54***            | 3.3***           |
|                         | FSS-4M/FSS-WT        | 3.68***       | 2.8***       | 2.1*            | 1.3         | 2.74**             | 1.9*             |
|                         | FSS-T106A/FSS-WT     | 1.0           |              |                 |             |                    |                  |
|                         | FSS-V1A/FSS-WT       | 1.1           |              |                 |             |                    |                  |
|                         | FSS-A188V/FSS-WT     | 1.5*          |              |                 | 1.3*        |                    |                  |
|                         | FSS-M872V/FSS-WT     | 1.0           |              |                 |             |                    |                  |

<sup>a</sup> Defined as final competitor ratio / inoculum ratio, as described previously to compare adaptive chikungunya virus mutations<sup>35</sup>.

\* P<0.05; \*\* P<0.01; \*\*\* P<0.001.

Extended Data Table 2. Primers and probes for gene cloning and qPCR

| Primers for cloning ZIKV full-length mutants | Upper primer                                    | Lower primer                                 |                                        |
|----------------------------------------------|-------------------------------------------------|----------------------------------------------|----------------------------------------|
| FSS-T106A                                    | GAAGAAGAGACGAGGC <sub>g</sub> CAGATACTAGTGTCG   | CGACACTAGTATCTG <sub>c</sub> GCCTCGTCTCTCTTC |                                        |
| FSS-V1A                                      | CCACAGCCATGGCAG <sub>c</sub> GGAGGTCCTAGACG     | CGTCTAGTACCTCC <sub>g</sub> CTGCCATGGCTGTGG  |                                        |
| FSS-A188V                                    | GTCATTGGAAACAGCCG <sub>i</sub> TAAGGGAAAGGAGGCT | AGCCTCTTTCCCTTA <sub>a</sub> CGGCTGTCCAATGAC |                                        |
| FSS-M872V                                    | CACAGTCAACATG <sub>g</sub> TcCGTAGGATCATAGGTG   | CACCTATGATCTACG <sub>Ac</sub> CAITGTGACTGTG  |                                        |
| DK-A106T                                     | GGAAGAGACGTGGC <sub>a</sub> CTGACACCAGCATCG     | CGATGCTGGTTCAG <sub>i</sub> GCCACGTCTCTTCC   |                                        |
| DK-A1V                                       | CACAGCCATGGCAG <sub>i</sub> CGAGATCACTAGACG     | CGTCTAGTATCTCG <sub>a</sub> CTGCCATGGCTGTG   |                                        |
| DK-V188A                                     | CCGTCATAGGAACAGCTG <sub>c</sub> CAAGGGAAAGG     | CCTTCCCTTG <sub>g</sub> CAGCTGTCTATGACGG     |                                        |
| DK-V872M                                     | AGACACAGTCAACATG <sub>a</sub> TGCGTAGGATCAT     | ATGATCCTACGC <sub>a</sub> iCATGTGACTGTGTCT   |                                        |
| Primers for one-step RT-PCR                  | Upper primer                                    | Lower primer                                 |                                        |
| FSS-T106A                                    | GGCGATTCTAGCCTTTTGG                             | TACCCCTCATCCAGCATA                           |                                        |
| FSS-V1A                                      | GGCGATTCTAGCCTTTTGG                             | TACCCCTCATCCAGCATA                           |                                        |
| FSS-A188V                                    | TGACACACTGAAGGAATGC                             | CACTATGCCATGGCCCTTT                          |                                        |
| FSS-M872V                                    | TGGAACAGAGTGTGGATTG                             | ATGGCGTTCTCGGCTGACTA                         |                                        |
| DK-A106T                                     | GGCGATACTAGCCTTCTTG                             | CAGGTCCGTACACAACCCA                          |                                        |
| DK-A1V                                       | GGCGATACTAGCCTTCTTG                             | CAGGTCCGTACACAACCCA                          |                                        |
| DK-V188A                                     | GCCAGTGCCTGTGAATGA                              | CACTATGCCATGGCCCTTT                          |                                        |
| DK-V872M                                     | AGAGTGTGGATTGAGGAGAA                            | ACTCAGTGTCTCTGAGGGG                          |                                        |
| Primers for sanger sequencing                | Upper primer                                    |                                              |                                        |
| FSS-T106A                                    | GGCGATTCTAGCCTTTTGG                             |                                              |                                        |
| FSS-V1A                                      | GGCGATTCTAGCCTTTTGG                             |                                              |                                        |
| FSS-A188V                                    | TGACACACTGAAGGAATGC                             |                                              |                                        |
| FSS-M872V                                    | TGGAACAGAGTGTGGATTG                             |                                              |                                        |
| DK-A106T                                     | GGCGATACTAGCCTTCTTG                             |                                              |                                        |
| DK-A1V                                       | GGCGATACTAGCCTTCTTG                             |                                              |                                        |
| DK-V188A                                     | GCCAGTGCCTGTGAATGA                              |                                              |                                        |
| DK-V872M                                     | AGAGTGTGGATTGAGGAGAA                            |                                              |                                        |
| The primers for Taqman RT-qPCR               | Upper primer                                    | Lower primer                                 | Probe (for Taqman QPCR)                |
| ZIKV envelope gene                           | AGGACGGGAGRTCCAATTGTGG                          | AGRCAAGCAGTCTCCCGGATG                        | FAM-TGCCGCCACCAAGATGAACTGATTGCGG-TAMRA |
